1 **Gene flow between divergent cereal- and grass-specific lineages of the**  
2 **rice blast fungus *Magnaporthe oryzae***

3

4 Pierre GLADIEUX <sup>1\*</sup>, Bradford CONDON <sup>2\*</sup>, Sebastien RAVEL<sup>3</sup>, Darren SOANES<sup>4</sup>, Joao Leodato  
5 Nunes MACIEL<sup>5</sup>, Antonio NHANI Jr<sup>5</sup>, Ryohei TERAUCHI<sup>7</sup>, Marc-Henri LEBRUN<sup>8</sup>, Didier THARREAU<sup>3</sup>,  
6 Thomas MITCHELL<sup>9</sup>, Kerry F. PEDLEY<sup>10</sup>, Barbara VALENT<sup>11</sup>, Nicholas J. TALBOT<sup>4</sup>, Mark FARMAN<sup>2</sup>,  
7 Elisabeth FOURNIER<sup>1</sup>

8 <sup>1</sup>INRA, UMR BGPI, Campus de Baillarguet, Montpellier F34398; <sup>2</sup>Department of Plant Pathology,  
9 University of Kentucky, Lexington, KY 40546; <sup>3</sup>CIRAD, UMR BGPI, Campus de Baillarguet,  
10 Montpellier F34398; <sup>4</sup>College of Life and Environmental Sciences, University of Exeter, Exeter EX4  
11 4QD, UK; <sup>5</sup> Embrapa Wheat, Passo Fundo, Brazil, <sup>6</sup> Embrapa Agricultural Informatics, Campinas,  
12 Brazil ; <sup>7</sup> Iwate Biotechnology Research Center, Kitakami, Iwate, Japan; <sup>8</sup>INRA-AgroParisTech UMR  
13 BIOGER, Campus AgroparisTech, Thiverval-Grignon, F78850; <sup>9</sup>Department of Plant Pathology, Ohio  
14 State University, Columbus, OH 43210; <sup>10</sup>USDA, Agricultural Research Service, FDWSRU, Ft.  
15 Detrick, Maryland, 21702, <sup>11</sup>Department of Plant Pathology, Kansas State University, Manhattan,  
16 KS 66506

17 \* These authors contributed equally to the work

18

19 Corresponding author: Elisabeth Fournier

20 e-mail: elisabeth.fournier@inra.fr

21 phone: +33 4 99 62 48 63

22

## 23 **Abstract**

24

25 Delineating species and epidemic lineages in fungal plant pathogens is critical to our  
26 understanding of disease emergence and the structure of fungal biodiversity, and also  
27 informs international regulatory decisions. *Pyricularia oryzae* (*syn. Magnaporthe oryzae*) is  
28 a multi-host pathogen that infects multiple grasses and cereals, is responsible for the most  
29 damaging rice disease (rice blast), and of growing concern due to the recent introduction of  
30 wheat blast to Bangladesh from South America. However, the genetic structure and  
31 evolutionary history of *M. oryzae*, including the possible existence of cryptic phylogenetic  
32 species, remain poorly defined. Here, we use whole-genome sequence information for 76 *M.*  
33 *oryzae* isolates sampled from 12 grass and cereal genera to infer the population structure  
34 of *M. oryzae*, and to reassess the species status of wheat-infecting populations of the fungus.  
35 Species recognition based on genealogical concordance, using published data or extracting  
36 previously-used loci from genome assemblies, failed to confirm a prior assignment of  
37 wheat blast isolates to a new species (*Pyricularia graminis tritici*). Inference of population  
38 subdivisions revealed multiple divergent lineages within *M. oryzae*, each preferentially  
39 associated with one host genus, suggesting incipient speciation following host shift or host  
40 range expansion. Analyses of gene flow, taking into account the possibility of incomplete  
41 lineage sorting, revealed that genetic exchanges have contributed to the makeup of  
42 multiple lineages within *M. oryzae*. These findings provide greater understanding of the  
43 eco-evolutionary factors that underlie the diversification of *M. oryzae* and highlight the  
44 practicality of genomic data for epidemiological surveillance in this important multi-host  
45 pathogen.

## 46 **Importance**

47 Infection of novel hosts is a major route for disease emergence by pathogenic micro-  
48 organisms. Understanding the evolutionary history of multi-host pathogens is therefore  
49 important to better predict the likely spread and emergence of new diseases. *Magnaporthe*  
50 *oryzae* is a multi-host fungus that causes serious cereal diseases, including the devastating  
51 rice blast disease, and wheat blast, a cause of growing concern due to its recent spread  
52 from South America to Asia. Using whole genome analysis of 76 fungal strains from  
53 different hosts, we have documented the divergence of *M. oryzae* into numerous lineages,  
54 each infecting a limited number of host species. Our analyses provide evidence that inter-  
55 lineage gene flow has contributed to the genetic makeup of multiple *M. oryzae* lineages  
56 within the same species. Plant health surveillance is therefore warranted to safeguard  
57 against disease emergence in regions where multiple lineages of the fungus are in contact  
58 with one another.

## 59 **Introduction**

60 Investigating population genetic structure in relation to life history traits such as  
61 reproductive mode, host range or drug resistance is particularly relevant in pathogens [1,  
62 2]. Knowledge of species, lineages, populations, levels of genetic variability and  
63 reproductive mode is essential to answer questions common to all infectious diseases, such  
64 as the tempo, origin, proximate (i.e. molecular) and ultimate (eco-evolutionary) causes of  
65 disease emergence and spread [3]. Multilocus molecular typing schemes have shown that  
66 cryptic species and lineages within species are often more numerous than estimated from  
67 phenotypic data alone. Genomic approaches are emerging as a new gold standard for  
68 detecting cryptic structure or speciation with increased resolution, allowing fine-grained  
69 epidemiological surveillance, science-based regulatory decisions. The added benefit of  
70 whole genomes approaches includes identifying the genetic basis of life history traits, and  
71 better understanding of both the genomic properties that influence the process of  
72 speciation and the signatures of (potentially incomplete) speciation that are observable in  
73 patterns of genomic variability [4, 5].

74 Many plant pathogenic ascomycete fungi are host-specific, and some of their life history  
75 traits have been shown to be conducive to the emergence of novel pathogen species  
76 adapted to new hosts [6, 7]. Investigating population structure within multi-host  
77 ascomycetes thus offers a unique opportunity to identify the genomic features associated  
78 with recent host-range expansions or host-shifts. In this study, our model is *Magnaporthe*  
79 *oryzae* (synonym of *Pyricularia oryzae*) [6-8], a fungal ascomycete causing blast disease on  
80 a variety of grass hosts. *Magnaporthe oryzae* is well studied as the causal agent of the most

81 important disease of rice (*Oryza sativa*), but it also causes blast disease on more than 50  
82 cultivated and wild monocot plant species [9]. This includes other cereal crops such as  
83 wheat (*Triticum aestivum*), barley (*Hordeum vulgare*), finger millet (*Eleusine coracana*), and  
84 foxtail millet (*Setaria italica*, *S. viridis*), as well as wild and cultivated grass hosts including  
85 goosegrass (*Eleusine indica*), annual ryegrass (*Lolium multiflorum*), perennial ryegrass (*L.*  
86 *perenne*), tall fescue (*Festuca arundinacea*) and St. Augustine grass (*Stenotaphrum*  
87 *secundatum*) [10]. Previous studies based on multilocus sequence typing showed that *M.*  
88 *oryzae* is subdivided into multiple clades, each found on only a limited number of host  
89 species, with pathogenicity testing revealing host-specificity as a plausible driver of genetic  
90 divergence [11, 12]. More recently, comparative genomics of eight isolates infecting wheat,  
91 goosegrass, rice, foxtail millet, finger millet and barley revealed deep subdivision of *M.*  
92 *oryzae* into three groups infecting finger millet or wheat, foxtail millet, and rice or barley  
93 [13, 14]. Subsequent analysis of genomic data from nine wheat-infecting isolates, two  
94 ryegrass infecting isolates, and one weeping lovegrass-infecting isolate subdivided lineages  
95 infecting wheat only on the one hand and wheat or ryegrass on the other hand, and  
96 revealed an additional lineage associated with the weeping lovegrass strain [15]. Together,  
97 these studies suggest a history of host-range expansion or host-shifts and limited gene flow  
98 between lineages within *M. oryzae*.

99 *Magnaporthe oryzae* isolates causing wheat blast represent a growing concern in terms of  
100 food security. This seed-borne pathogen can spread around the world through movement  
101 of seed or grain. Therefore, understanding the evolutionary origin and structure of  
102 populations causing wheat blast is a top priority for researchers studying disease  
103 emergence and for regulatory agencies. Wheat blast was first discovered in southern Brazil

104 in 1985 [16] and the disease subsequently spread to the neighboring countries of  
105 Argentina, Bolivia and Paraguay [17-19] where it represents a considerable impediment to  
106 wheat production [20, 21]. Until recently, wheat blast had not been reported outside South  
107 America. In 2011, a single instance of infected wheat was discovered in the U.S., but  
108 analysis of the isolate responsible revealed that it was genetically similar to a local isolate  
109 from annual ryegrass and, therefore, unlikely to be an exotic introduction from South  
110 America [22]. More recently, in 2016, wheat blast was detected in Bangladesh [23]. Unlike  
111 the U.S. isolate, strains sequenced from this outbreak resembled South American wheat  
112 blast isolates rather than ryegrass-derived strains [15, 23], thereby confirming the spread  
113 of wheat blast from South America.

114 It has recently been proposed that a subgroup of the wheat-infecting isolates, together with  
115 some strains pathogenic on *Eleusine* spp. and other *Poaceae* hosts, belongs to a new  
116 phylogenetic species, *Pyricularia graminis-tritici* (*Pgt*) that is well separated from other  
117 wheat- and ryegrass-infecting isolates, as well as pathogens of other grasses [24]. However,  
118 this proposed split was based on bootstrap support in a genealogy inferred from multilocus  
119 sequence concatenation, and not on a proper application of Genealogical Concordance for  
120 Phylogenetic Species Recognition (GCPSR; [25, 26]). The observed lineage divergence  
121 appeared to be mostly driven by genetic divergence at one of 10 sequenced loci, raising  
122 doubts about the validity of species identification.

123 The present study was designed to re-assess the hypothesis that *Pgt* constitutes a cryptic  
124 species within *M. oryzae* and, more generally, to infer population structure in relation to  
125 host of origin in this important pathogen. Using whole-genome sequences for 81

126 *Magnaporthe* isolates (76 *M. oryzae* from 12 host genera, four *M. grisea* from crabgrass  
127 [*Digitaria* spp.], and one *M. pennisetigena* from *Pennisetum* sp.) we addressed the following  
128 questions: do *M. oryzae* isolates form distinct host-specific lineages; and is there evidence  
129 for relatively long-term reproductive isolation between lineages (i.e. cryptic species) within  
130 *M. oryzae*? Our analyses of population subdivision and species identification revealed  
131 multiple divergent lineages within *M. oryzae*, each preferentially associated with one host  
132 genus, but refuted the existence of a novel cryptic phylogenetic species named  
133 *P. graminis-tritici*. In addition, analyses of gene flow revealed that genetic exchanges have  
134 contributed to the makeup of the multiple lineages within *M. oryzae*.

## 135 **Results**

### 136 **Re-assessing the validity of the proposed *P. graminis-tritici* species by analyzing the** 137 **original published data according to Phylogenetic Species Recognition by** 138 **Genealogical Concordance (GCPSR)**

139 To test the previous delineation of a subgroup of wheat-infecting isolates as a new  
140 phylogenetic species, we re-analyzed the Castroagudin et al. dataset [24], which mostly  
141 included sequences from Brazilian isolates. However, instead of using bootstrap support in  
142 a total evidence genealogy inferred from concatenated sequences for species delineation,  
143 we properly applied the GCPSR test [25, 26]. This test identifies a group as an independent  
144 evolutionary lineage (i.e. phylogenetic species) if it satisfies two conditions: (1)  
145 Genealogical concordance: the group is present in the majority of the single-locus  
146 genealogies, (2) Genealogical nondiscordance: the group is well-supported in at least one  
147 single-locus genealogy and is not contradicted in any other genealogy at the same level of

148 support [25]. Visual inspection of the topologies and supports in each single-locus tree  
149 revealed that GCPSR condition (1) was not satisfied since isolates previously identified as  
150 belonging to the phylogenetic species *Pgt* grouped together in only one maximum  
151 likelihood “gene” genealogy – the one produced using the *MPG1* locus (Figure S1). The *Pgt*  
152 separation was not supported by any of the nine other single-locus genealogies (Figures  
153 S2-S10).

154 Next, we used the multilocus data as input to the program ASTRAL with the goal of  
155 inferring a species tree that takes into account possible discrepancies among individual  
156 gene genealogies [27-29]. The ASTRAL tree failed to provide strong support for the branch  
157 holding the isolates previously identified as *Pgt* (Figure S11). Thus, treatment of the  
158 Castroagudin et al. data according to GCPSR standards failed to support the existence of the  
159 newly described *Pgt* species.

#### 160 **Inferring population subdivision within *M. oryzae* using whole genome data**

161 We sought to test whether a phylogenomic study could provide better insight into the  
162 possibility of speciation within *M. oryzae*. To this end, whole genome sequence data were  
163 acquired for a comprehensive collection of 76 *M. oryzae* isolates from 12 host genera, four  
164 *M. grisea* isolates from *Digitaria* spp. and one *M. pennisetigena* isolate from *Pennisetum*  
165 (Table 1). The analysis included data for strains collected on rice (*Oryza sativa*), finger  
166 millet and goosegrass (*Eleusine* spp.), wheat (*Triticum* spp.), tall fescue (*Festuca*  
167 *arundinaceum*), annual and perennial ryegrasses (*Lolium multiflorum* and *L. perenne*,  
168 respectively), and barley (*Hordeum vulgare*). Also included were representatives of  
169 previously unstudied host-specialized populations from foxtails (*Setaria* sp.), St. Augustine



170 grass (*Stenotaphrum secundatum*), weeping lovegrass (*Eragrostis curvula*), signalgrass  
171 (*Brachiaria* sp.), panicgrass (*Bromus tectorum*) and oat (*Avena sativa*). Analyses were based  
172 on 2,682 orthologous coding sequences that were single-copy in all *M. oryzae* genomes (in  
173 total ~6.6 Mb of sequence data), and from whole-genome SNPs identified from pairwise  
174 blast alignments of repeat-masked genomes (average ~36 Mb aligned sequence).

175 First we employed the multivariate approach implemented in Discriminant Analysis of  
176 Principal Components (DAPC; [30]) to examine population subdivision within *M. oryzae*.  
177 Using the haplotypes identified from orthologous loci, the Bayesian Information Criterion  
178 plateaued at K=10 in models varying K from 2 to 20 clusters, indicating that K=10 captures  
179 the most salient features of population subdivision (Figure S12). Clusters identified at K=10  
180 were as follows: (1) isolates from rice and two isolates from barley (dark green); (2)  
181 isolates from *Setaria* sp. (light green); (3) isolate Bd8401 from *Brachiaria distachya*  
182 (brown); (4) isolate Bm88324 from *Brachiaria mutica* (olive); (5) isolates from  
183 *Stenotaphrum* (red); (6) 17 of the 22 isolates from wheat and an isolate from *Bromus*  
184 (blue); (7) the remaining 3/22 isolates from wheat together with isolates from *Lolium*,  
185 *Festuca*, oat and a second isolate from *Bromus* (purple); (8 & 9) isolates from *Eleusine* that  
186 formed two distinct clusters (orange and light orange); and (10) an isolate from *Eragrostis*  
187 (yellow) (Figure 1). Increasing K mostly resulted in further subdivision among the isolates  
188 from wheat, rice and *Lolium* sp. The discovery of three wheat blast isolates that grouped  
189 with the *Festuca-Lolium* pathogens in cluster 7 was important because it supports the idea  
190 that wheat-infecting isolates belong to at least two distinct populations.

191 Next, we inferred gene genealogies using maximum-likelihood and distance-based methods.  
192 Both approaches produced trees that corresponded well with the subdivisions identified in  
193 DAPC. The tree generated using maximum likelihood (ML) analysis of orthologous genes  
194 displayed a topology with eight well-supported lineages (Figure 2). Six of these lineages  
195 had 100% bootstrap support and showed one-to-one correspondence with the K clusters  
196 from DAPC (Figure 1). Another well-supported lineage comprised sister clades made up of  
197 the *Eleusine* and *Eragrostis* pathogens (Figure 1; Figure S12). The final lineage  
198 corresponded perfectly with the “blue” DAPC cluster which contained the 17 isolates from  
199 wheat and isolate P29 from *Bromus*. This last lineage had poor bootstrap support (50%),  
200 however, and showed evidence of further population subdivision among the constituent  
201 isolates (i.e. high confidence subclades).

202 The neighbor-joining tree built using “total genome” pairwise distances resolved very  
203 similar groupings to the ML ortholog tree (Figure 3). The only major discrepancy between  
204 ML and NJ trees was the confident placement of 87-120 – an isolate from rice – outside of  
205 the rice clade in the NJ tree (Figure 3).

## 206 **Levels of polymorphism within and divergence between lineages/species**

207 We compared levels of polymorphism within lineages to levels of divergence between  
208 lineages or species to apprehend the relative depth of the lineages within *M. oryzae*.

209 Genetic variability based on 2,682 orthologs was relatively low and one order of magnitude  
210 higher in the rice and wheat lineages (0.1%) than in the *Lolium* and *Setaria* lineages (other  
211 lineages not included in the calculations due to small sample sizes – only lineages with n>6  
212 included; Table 2). The null hypothesis of no recombination could be rejected in the *Lolium*,

213 wheat, rice and *Setaria* lineages using the Pairwise Homoplasmy Test implemented in the  
214 SPLITSTREE 4.13 program ([31]; p-value:0.0; Table 2).

215 Genome-wide nucleotide divergence was one order of magnitude higher between *M. oryzae*  
216 and its closest relatives, *M. grisea* and *M. pennisetigena*, than it was among isolates within  
217 *M. oryzae*. The maximum pairwise distance (SNPs per kilobase) between any two *M. oryzae*  
218 isolates was less than 1%, genome-wide (Figure S13; Table S1), compared with *M. oryzae*  
219 vs *M. grisea*, *M. oryzae* vs. *M. pennisetigena*, or *M. grisea* vs *M. pennisetigena*, all of which  
220 were consistently greater than 10%. The low level of genetic divergence among *M. oryzae*  
221 isolates, compared with that observed against isolates with established separate species  
222 status, provides good evidence against the relatively ancient cryptic species within  
223 *M. oryzae*. (Table S1).

#### 224 **Re-assessment of Pgt as a novel species using whole genome data**

225 While the 10 loci utilized in the Castroagudin et al. [24] study do not support the *Pgt* split  
226 based on GCPSR criteria, our DAPC and whole genome ML and NJ analyses supported the  
227 partitioning of wheat blast isolates into two, genetically-distinct groups: one consisting  
228 almost exclusively of wheat-infecting isolates, the other comprising largely *Festuca*- and  
229 *Lolium*-infecting isolates as well as few wheat-infecting isolates (Figure 2; Figure 3).  
230 Unfortunately, the Castroagudin et al. study did not include *Festuca*- and *Lolium*-infecting  
231 isolates and genome sequences are not available for their strains. Therefore, to test for  
232 possible correspondence between the proposed *Pgt* species and the *Festuca-Lolium* group  
233 (or indeed the *Triticum* group), we extended the 10 loci analysis to the *M. oryzae* genome  
234 sequences used in the present study. For reference, we included the multilocus data for 16

235 Castroagudin et al. strains representing all the major clades from that study. Nine of the 10  
236 loci were successfully recovered from 68 of our *M. oryzae* genome sequences. The  
237 remaining locus, CH7-BAC9, was absent from too many genome assemblies and, as a result,  
238 was excluded from the analysis.

239 The nine concatenated loci produced a total evidence RAxML tree in which very few  
240 branches had bootstrap support greater than 50% (Figure 4). All of the *Pgt* isolates from  
241 the Castroagudin et al. study were contained in a clade with 80% support (labeled Clade A).  
242 Inspection of the *MPG1* marker that was reported to be diagnostic for *Pgt* (Castroagudin et  
243 al. 2016) revealed that all of the isolates on this branch contained the *Pgt*-type allele (green  
244 dots) and should therefore be classified as *Pgt* (Figure 4). Critically, however, this group  
245 also included isolates from the present study which came from wheat, annual ryegrass,  
246 perennial ryegrass, tall fescue, finger millet, and goosegrass – isolates that did not group  
247 together in the DAPC analysis (Figure 1), or in the ML and NJ trees built using the  
248 orthologous genes or whole genome SNP data (Figure 2; Figure 3). Instead they were  
249 distributed among three genetically distinct and well-supported clades (Figure 2; Figure 3).  
250 Furthermore, visual inspection of the topologies and bootstrap supports for each single-  
251 locus tree revealed that GCPSR criteria were not satisfied for clade A. Thus, isolates  
252 characterized by Castroagudin et al. [24] as *Pgt* fail to constitute a phylogenetically  
253 cohesive group based on total genome evidence and, thus, the *Pgt* species is an artificial  
254 construct.

255 The basis for the erroneous designation of *Pgt* as a novel species was clearly revealed when  
256 *MPG1* alleles were mapped onto the ML and NJ trees because there was a remarkable lack

257 of correspondence between allelic distribution and the phylogenetic groupings determined  
258 using whole genome evidences. The *Pgt*-type allele was distributed among three different  
259 clades but showed a discontinuous distribution. As an example, the *Triticum* group  
260 contained three *MPG1* alleles. Two of these (including the *Pgt*-type) were also present in  
261 the *Festuca-Lolium* clade, while the third was shared by distantly-related isolates from  
262 *Stenotaphrum* (Figure S14). The *Eleusine* group also contained the *Pgt* allele and two other  
263 variants, while the *Setaria* and *Oryza* pathogens possessed an *MPG1* allele distinct from all  
264 the others. Overall, the distribution of *MPG1* alleles points to the occurrence of incomplete  
265 lineage sorting and/or gene flow during *M. oryzae* diversification. Importantly, at least six  
266 of the other markers studied by Castroagudin et al. showed similar discontinuities in their  
267 distributions (Figure S15). In addition, two of the Castroagudin et al. markers (*ACT1* and  
268 *CHS1*) showed no sequence variation among the 68 *M. oryzae* isolates analyzed in the  
269 present study (data not shown).

## 270 **Species tree inference and phylogenetic species recognition from genome-wide data**

271 The total evidence genealogies generated using distance-based and maximum likelihood  
272 approaches on 2,682 single-copy orthologs and 76 *M. oryzae* genomes (Figure 2; Figure 3)  
273 were highly concordant in terms of lineage composition and branching order. However,  
274 concatenation methods can be positively misleading, as they assume that all gene trees are  
275 identical in topology and branch lengths and they do not explicitly model the relationship  
276 between the species tree and gene trees [32]. To estimate the “species tree” and to re-  
277 assess previous findings of cryptic species within *M. oryzae*, we therefore used a  
278 combination of species inference using the multispecies coalescent method implemented in  
279 ASTRAL [27-29] and a new implementation of the GCPSR that can handle genomic data.

280 The ASTRAL “species tree” with the local q1 support values on key branches is shown in  
281 Figure 5. The four *M. grisea* isolates from crabgrass (*Digitaria* sp.) and the *M. pennisetigena*  
282 isolate from fountaingrass (*Pennisetum* sp.) were included as outgroups, bringing the total  
283 number of isolates to 81 and reducing the dataset to 2,241 single-copy orthologous genes.  
284 The branches holding the clades containing the wheat blast isolates had q1 support values  
285 of 0.49, 0.39 and 0.37 which means that, in each case, fewer than 50% of the quartet gene  
286 trees agreed with the species tree around these branches. The branches that separated *M.*  
287 *grisea* and *M. pennisetigena* from *M. oryzae* had respective q1 values of 1, providing strong  
288 support for relatively ancient speciation. In contrast, the highest q1 value on any of the  
289 branches leading to the host-specialized clades was 0.8 for the *Setaria* pathogens,  
290 indicating that approximately 20% of the quartet gene trees are in conflict with the species  
291 tree around this branch. Together, these results indicate high levels of incomplete lineage  
292 sorting within, and/or gene flow involving these groups, and are thus inconsistent with the  
293 presence of genetically isolated lineages (i.e. species).

294 As a formal test for the presence of cryptic species within *M. oryzae*, we applied the  
295 phylogenetic species recognition criteria to the set of 2,241 single-copy orthologous genes  
296 using an implementation of the GCPSR scalable to any number of loci. Applying the GCPSR  
297 following the non-discordance criterion of Dettman et al. (a clade has to be well supported  
298 by at least one single-locus genealogy and not contradicted by any other genealogy at the  
299 same level of support; [25]) resulted in the recognition of no species within *M. oryzae*.

### 300 **Admixture and gene flow between lineages**

301 The existence of gene flow and/or incomplete lineage sorting was also supported by  
302 phylogenetic network analysis. We used the network approach neighbor-net implemented  
303 in SPLITSTREE 4.13 [25] to visualize evolutionary relationships, while taking into account the  
304 possibility of recombination within or between lineages. The network inferred from  
305 haplotypes identified using the 2,682 single-copy orthologs in the 76 *M. oryzae* strains,  
306 showed extensive reticulation connecting all lineages, consistent with recombination or  
307 incomplete lineage sorting (Figure 6). To disentangle the role of gene flow versus  
308 incomplete lineage sorting in observed network reticulations, we used ABBA/BABA tests,  
309 which compare numbers of two classes of shared derived alleles (the ABBA and BABA  
310 classes). For three lineages P1, P2 and P3 and an outgroup with genealogical relationships  
311 (((P1,P2),P3),O), and under conditions of no gene flow, shared derived alleles between P2  
312 and P3 (ABBA alleles) and shared derived alleles between P1 and P3 (BABA alleles) can  
313 only be produced by incomplete lineage sorting, and should be equally infrequent [33].  
314 Differences in numbers of ABBA and BABA alleles are interpreted as gene flow assuming no  
315 recurrent mutation and no deep ancestral population structure within lineages. The D  
316 statistic measuring differences in counts of ABBA and BABA alleles was significantly  
317 different from zero (Z-score>3) in 66 of 68 lineage triplets, consistent with a history of  
318 gene flow between lineages within *M. oryzae* (Table S2).

319 We then used the program STRUCTURE [34-36] to gain further insight into the possibility of  
320 recent admixture between lineages (Figure S16). STRUCTURE uses Markov chain Monte Carlo  
321 simulations to infer the assignment of genotypes into K distinct clusters, minimizing  
322 deviations from Hardy-Weinberg and linkage disequilibria within each cluster. STRUCTURE  
323 analysis provided evidence for admixture at all K values (Figure S16), suggesting that

324 recent admixture events have recently shaped patterns of population subdivision within *M.*  
325 *oryzae*. The patterns of clustering inferred with STRUCTURE were largely similar to those  
326 inferred with DAPC.

## 327 **Discussion**

### 328 **Population subdivision but no cryptic phylogenetic species**

329 Using population- and phylogenomic analyses of single-copy orthologous genes and whole-  
330 genome SNPs identified in *M. oryzae* genomes from multiple cereal and grass hosts, we  
331 provide evidence that *M. oryzae* is subdivided in multiple lineages preferentially associated  
332 with one host genus. Neither the re-analysis of previous data, nor the analysis of new data  
333 using previous phylogenetic species recognition markers, confirmed the existence of a  
334 wheat blast-associated species called *P. graminis-tritici* [24]. Marker *MPG1*, which holds  
335 most of the divergence previously detected, does not stand as a diagnostic marker of the  
336 wheat-infecting lineage of *M. oryzae* when tested in other lineages. Improper species  
337 identification of cryptic species also stems from the fact that available information on *M.*  
338 *oryzae* diversity has been insufficiently taken into account. In particular, isolates from the  
339 lineages most closely related to wheat strains (i.e. the *Lolium* lineage; [11, 12, 15, 22]) were  
340 not represented in species identification work [24]. Hence, phylogenetic species  
341 recognition by genealogical concordance did not identify cryptic phylogenetic species and  
342 thus *M. oryzae* is not, strictly speaking, a species complex. As a consequence, Pgt should be  
343 dismissed as a novel species.

### 344 **Incipient speciation by ecological specialization following host-shifts**

345 Several features of the life cycle of *M. oryzae* are conducive to speciation by ecological



346 specialization following host shifts, suggesting that the observed pattern of population  
347 subdivision in *M. oryzae* actually corresponds to ongoing speciation. Previous experimental  
348 measurements of perithecia formation and ascospore production – two important  
349 components of reproductive success- suggested inter-fertility in vitro between most pairs  
350 of lineages with high levels of ascospore viability [37-40]. This suggests that intrinsic pre-  
351 or post-mating reproductive barriers, such as assortative mating by mate choice or gametic  
352 incompatibility, and zygotic mortality, are not responsible for the relative reproductive  
353 isolation between lineages – which creates the observed pattern of population subdivision.  
354 Instead, the relative reproductive isolation between lineages could be caused by one or  
355 several pre- or post-mating barriers (Table 1 in [41]), such as mating-system isolation or  
356 hybrid sterility (intrinsic barrier), or difference in mating times, difference in mating sites,  
357 immigrant inviability, or ecologically-based hybrid inviability (extrinsic barriers).

358 Previous pathogenicity assays revealed extensive variability in the host range of *M. oryzae*  
359 isolates, and both in terms of pathogenicity towards a set of host species or pathogenicity  
360 towards a set of genotypes from a given host [38, 42]. Indeed, extensive genetic analyses  
361 show that host species specificity in *M. oryzae*, similar to rice cultivar specificity, is  
362 controlled by a gene-for-gene relationship in which one to three avirulence genes in the  
363 fungus prevent infection of particular host species [40, 43, 44]. Loss of the avirulence genes  
364 would allow infection of novel hosts to occur. Additionally, host species specificity is not  
365 strictly maintained. Under controlled conditions, most lineages have at least one host in  
366 common [42], and strains of within one lineage can still cause rare susceptible lesions on  
367 naive hosts [21, 45]. Moreover, a single plant infected by a single genotype can produce  
368 large numbers of spores in a single growing season [46], allowing the pathogen to persist

369 on alternative host even if selection is strong, and promoting the rapid and repeated  
370 creation of genetic variation [6]. Although some of these features appear to be antagonistic  
371 with the possibility of speciation by host-specialization within *M. oryzae*, our finding that  
372 the different lineages within *M. oryzae* tend to be sampled on a single host suggests that  
373 ecological barriers alone may in fact contribute to reduce gene flow substantially between  
374 host-specific lineages.

375 Mating within host (i.e. reproduction between individuals infecting the same host), and to a  
376 lesser extent mating system isolation (i.e. lack of outcrossing reproduction), may  
377 contribute to further reduce gene flow between *M. oryzae* lineages. The fact that mating in  
378 *M. oryzae* likely occurs within host tissues, such as dead stems [47], may participate in the  
379 maintenance of the different lineages by decreasing the rate of reproduction between  
380 isolates adapted to different hosts [6]. Loss of sexual fertility also appears to have a role in  
381 lineage maintenance. The rice lineage, in particular, is single mating-type and female-sterile  
382 throughout most of its range, which would reduce the chance of outcrossing sex with  
383 members of other lineages [48]. Our analyses rejected the null hypothesis of clonality in all  
384 lineages, but they provided no time frame for the detected recombination events.  
385 Population-level studies and experimental measurements of mating type ratios and female  
386 fertility are needed to assess the reproductive mode of the different lineages within *M.*  
387 *oryzae* in the field.

### 388 **Inter-lineage gene flow**

389 Several potential barriers contribute to reduce genetic exchanges between *M. oryzae*  
390 lineages (see previous paragraph), but not completely so, as evidenced by signal of gene

391 flow and admixture detected in our genomic data. We hypothesize that the lack of strict  
392 host specialization of the different lineages is a key driver of inter-lineage gene flow. Many  
393 of the grass or cereal species that are hosts to *M. oryzae* are widely cultivated as staple  
394 crops or widely distributed as pasture or weeds, including “universal suscepts” such as  
395 Italian ryegrass, tall fescue and weeping lovegrass [37], increasing the chance for  
396 encounters and mating between isolates with overlapping host ranges. These shared hosts  
397 may act as a platform facilitating encounters and mating between fertile and compatible  
398 isolates from different lineages, thereby enabling inter-lineage gene flow [49]. Plant health  
399 vigilance is therefore warranted for disease emergence via recombination in regions where  
400 multiple lineages are in contact and shared hosts are present. This is particularly so, given  
401 that once infection of novel host has taken place (i.e. host shift or host range expansion),  
402 the fungus has the capacity to build inoculum levels very rapidly, facilitating spread of the  
403 disease over considerable distances. It is striking, for example, that wheat blast has, within  
404 a year, spread from Bangladesh into the West Bengal region of India where it emerged in  
405 2017 ([openwheatblast.org](http://openwheatblast.org)).

## 406 **Conclusion**

407 Using a population genomics framework, we show that *M. oryzae* is subdivided into  
408 multiple lineages with limited host range and evidence of genetic exchanges between them.  
409 Our findings provide greater understanding of the eco-evolutionary factors underlying the  
410 diversification of *M. oryzae* and highlight the practicality of genomic data for  
411 epidemiological surveillance of its different intraspecific lineages. Reappraisal of species  
412 boundaries within *M. oryzae* refuted the existence of a novel cryptic phylogenetic species  
413 named *P. graminis-tritici*, underlining that the use of node support in total evidence

414 genealogies based on a limited dataset in terms of number of loci and of range of variation  
415 in origin (geography and host) of isolates can lead to erroneously identify fungal cryptic  
416 species. Our work illustrates the growing divide between taxonomy that ‘creates the  
417 language of biodiversity’ [50] based on limited sets of characters, and genomic data that  
418 reveals more finely the complexity and continuous nature of the lineage divergence process  
419 called speciation.

## 420 **Materials and Methods**

### 421 **Fungal strains**

422 Thirty-eight newly sequenced genomes were analyzed together with 43 published  
423 genomes [13, 14, 22, 51-53] resulting in a total of 81 *Magnaporthe* strains, including 76 *M.*  
424 *oryzae* genomes representing 12 different hosts available for analysis (Table 1). We also  
425 included as outgroups one strain of *Pyricularia pennisetigena* from *Pennisetum* sp. and four  
426 strains of *Pyricularia grisea* (aka *Magnaporthe grisea*) from crabgrass (*Digitaria*  
427 *sanguinalis*). All newly sequenced strains were single-spored prior to DNA extraction.

428

### 429 **Genome sequencing and assembly**

430 New genome data were produced by an international collaborative effort. Characteristics of  
431 genome assemblies are summarized in Table S3. For newly sequenced genomes provided  
432 by MF and BV, sequences were acquired on a MiSeq machine (Illumina, Inc.). Sequences  
433 were assembled using the paired-end mode in NEWBLER V2.9 (Roche Diagnostics,  
434 Indianapolis, IN). A custom perl script was used to merge the resulting scaffolds and  
435 contigs files in a non-redundant fashion to generate a final assembly. Newly sequenced

436 genomes BR130 and WHTQ provided by TM were sequenced using an Illumina paired-end  
437 sequencing approach at >50X depth. Short reads were assembled *de-novo* using VELVET 1.2.10  
438 [54] resulting in a 41.5Mb genome for BR130 with N50 44.8Kb, and 43.7Mb for WHTQ with  
439 N50 36.2Kb. For newly sequenced genomes provided by DS and NT, DNA was sequenced on  
440 the Illumina HiSeq 2500 producing 100 base paired-end reads, except in the case of VO107  
441 which was sequenced on the Illumina Genome Analyzer II producing 36 base paired-end  
442 reads. Reads were filtered using FASTQ-MCF and assembled 'de novo' using VELVET 1.2.10  
443 [54].

444

#### 445 **Orthologous genes identification in genomic sequences**

446 Protein-coding gene models were predicted using AUGUSTUS V3.0.3 [55]. Orthologous genes  
447 were identified in the 76-genomes *M. oryzae* or in the dataset including outgroups using  
448 PROTEINORTHO [56]. The v8 version of the 70-15 *M. oryzae* reference genome [57] was  
449 added at this step in order to validate the predicted sets of orthologs. Only orthologs that  
450 were single-copy in all genomes were included in subsequent analyses. Genes of each  
451 single-copy orthologs sets were aligned using MACSE [58]. Sequences from the lab strain  
452 70-15 were removed and not included in further analyses due to previously shown hybrid  
453 origin [13]. Only alignments containing polymorphic sites within *M. oryzae* strains were  
454 kept for further analyses. This resulted in 2,241 alignments for the whole dataset, and  
455 2,682 alignments for the 76 *M. oryzae* strains.

456

#### 457 **Population subdivision, summary statistics of polymorphism and divergence**

458 Population subdivision was analyzed using DAPC and STRUCTURE [30, 34-36], based on  
459 multilocus haplotype profiles identified from ortholog alignments using a custom Python  
460 script. DAPC was performed using the ADEGENET package in R [13]. We retained the first 30  
461 principal components, and the first 4 discriminant functions. Ten independent STRUCTURE  
462 runs were carried out for each number of clusters K, with 100,000 MCMC iterations after a  
463 burn-in of 50,000 steps.

464 Polymorphism statistics were computed using EGGLIB 3.0.0b10 [59] excluding sites with  
465 >30% missing data. Divergence statistics were computed using a custom perl script.

466 To infer total evidence trees within the 76 *M. oryzae* strains (respectively within the 81  
467 *Magnaporthe* strains), all sequences from the 2,682 (respectively 2,241) orthologous  
468 sequences were concatenated. The maximum-likelihood tree was inferred using RAxML [60]  
469 with the GTR-gamma model, and bootstrap supports were estimated after 1000 replicates.

#### 470 **Retrieval of loci used in the Castroagudin et al. (2016) study**

471 The 10 loci used by Castroagudin et al. [24], i.e. actin (ACT), beta-tubulin1 ( $\beta$ T-1),  
472 calmodulin (CAL), chitin synthase 1 (CHS1), translation elongation factor 1-alpha (EF1- $\alpha$ ),  
473 hydrophobin (MPG1), nitrogen regulatory protein 1 (NUT1), and three anonymous  
474 markers (CH6, CH7-BAC7, CH7-BAC9), were search in all genomes using BLASTn. Due to  
475 heterogeneity in the quality of assemblies, 9 of the 10 loci could be full-length retrieved  
476 without ambiguity in 68 out of the 81 available genomes, still representative of the  
477 diversity of host plants.

478

#### 479 **Secondary data analysis**

480 Species recognition based on multiple gene genealogies as described by Castroagudin et al.  
481 [24] was repeated following the reported methods. The robustness of the Pgt species  
482 inference was tested by re-iterating the study, omitting one marker at a time. Individual  
483 genealogies were built using RAxML with the GTR-gamma model and 100 bootstrap  
484 replicates.

485

#### 486 **Inference of “species tree” using ASTRAL**

487 The ASTRAL method [27, 29] is based on the multi-species coalescent and allows taking  
488 into account possible discrepancies among individual gene genealogies to infer the “species  
489 tree”. Individual genealogies inferred using RAxML with the GTR-gamma model and 100  
490 bootstrap replicates, were used as input data for ASTRAL analysis. Local supports around  
491 branches were evaluated with 100 multilocus bootstrapping using the bootstrap replicates  
492 inferred from each individual gene tree as input data, and with local quartet supports (q1,  
493 obtained using the -t option of ASTRAL) that represent the proportion of quartet trees  
494 around the branch that agree with the topology of this branch in the species tree.

495

#### 496 **MPG1-based classification**

497 The *MPG1* hydrophobin sequence is described as being diagnostic for the  
498 *P. graminis-tritici*/*M. oryzae* species split [24]. *MPG1* sequences from one of each species  
499 (GIs: KU952644.1 for *P. graminis-tritici*, KU952661.1 for *M. oryzae*) were used as BLAST  
500 [61] queries to classify isolates as either *P. graminis-tritici* or *M. oryzae*.

501

#### 502 **Signatures of gene flow and/or incomplete lineage sorting**

503 A phylogenetic network was built using SPLITSTREE 4.13 [62], based on the concatenation of  
504 sequences at single-copy orthologs identified in *M. oryzae*, excluding sites with missing  
505 data, sites with gaps, singletons, and monomorphic sites. The null hypothesis of no  
506 recombination was tested using the PHI test implemented in SPLITSTREE.

507

#### 508 **ABBA/BABA tests**

509 ABBA/BABA tests were performed using custom python scripts. The D statistic measuring  
510 the normalized difference in counts of ABBA and BABA sites was computed using equation  
511 (2) in ref. [63]. Significance was calculated using block jackknife approach (100 replicates,  
512 1k SNPs blocks), to account for non-independence among sites.

513

#### 514 **Phylogenetic species recognition**

515 We used an implementation of the GCPSR scalable to genomic data ([https://github.com/b-](https://github.com/b-brankovics/GCPSR)  
516 [brankovics/GCPSR](https://github.com/b-brankovics/GCPSR)). The method works in two steps: (1) Concordance and non-  
517 discordance analysis produces a genealogy that has clades that are both concordant and  
518 non-discordant across single gene genealogies, with support value for each of the clades  
519 being the number of single gene genealogies harboring the given clade at bootstrap support  
520 above 95%; (2) Exhaustive subdivision places all the strains into the least inclusive clades,  
521 by removing clades that would specify a species within potential phylogenetic species. We  
522 kept only two outgroup sequences per gene (BR29, *M. grisea*; Pm1, *M. pennisetigena*) to  
523 make sure to have the same isolate at the root of all genealogies (Pm1 isolate). Majority-  
524 rule consensus trees were produced from 100 outgrouped RAxML bootstrap replicates for  
525 all 2241 genes. The concordance and non-discordance analysis was carried out assuming



526 95 as the minimum bootstrap support value, and a discordance threshold of 1. Exhaustive  
527 subdivision was carried out using a concordance threshold of 1121.

528

### 529 **Whole genome alignment & tree building**

530 A custom perl script was used to mask sequences that occur in multiple alignments when  
531 the genome is BLASTed against itself. The masked genomes were then aligned in a pairwise  
532 fashion against all other genomes using BLAST [61]. Regions that did not uniquely align in  
533 each pair at a threshold of  $1e^{-200}$ , were excluded. SNPs were then identified for each  
534 pairwise comparison and scaled by the total number of nucleotides aligned after excluding  
535 repetitive and duplicate regions. This produced a distance metric of SNPs/Mb of uniquely  
536 aligned DNA. The pairwise distances were used to construct phylogenetic trees with the  
537 neighbor-joining method as implemented in the R package, Analyses of Phylogenetics and  
538 Evolution (APE) [64].

539 Because alignments are in pairwise sets as opposed to a single orthologous set, assessment  
540 of confidence values by traditional bootstrapping by resampling with replacement is not  
541 possible. Instead, confidence values were assigned by creating 1,000 bootstrap trees with  
542 noise added from a normal distribution with a mean of zero, and the standard deviation  
543 derived from the pairwise distances between or within groups.

## Acknowledgments

We thank Sophien Kamoun for inspiration and for providing critical input on a previous version of the manuscript, Alfredo Urshimura for collecting and supplying us with the DNA of Brazilian isolates, the Southgreen and Migale computing facilities, A. Akhunova at the Kansas State University Integrated Genomics Facility, and L. Chen, J. Webb, M. Heist and R. Ellsworth at the University of Kentucky for their technical assistance. Support is acknowledged by the Agriculture and Food Research Initiative Competitive Grant No. 2013-68004-20378 from the USDA National Institute of Food and Agriculture. This is contribution number 18-005-J from the Kansas Agricultural Experiment Station and contribution number XX-XX-XXX from the Kentucky Agricultural Experiment Station.

## Tables

**Table 1. *Magnaporthe oryzae*, *M. grisea* and *M. pennisetigena* strains used in this study**

| Strain (ID if different) | Host                     | Year | Place of Isolation             | Sequence source |
|--------------------------|--------------------------|------|--------------------------------|-----------------|
| BdBar                    | <i>Triticum aestivum</i> | 2016 | Barisal, Bangladesh            | this study      |
| BdJes                    | <i>Triticum aestivum</i> | 2016 | Jessore, Bangladesh            | this study      |
| BdMeh                    | <i>Triticum aestivum</i> | 2016 | Mehepur, Bangladesh            | this study      |
| B2                       | <i>Triticum aestivum</i> | 2011 | Bolivia                        | this study      |
| B71                      | <i>Triticum aestivum</i> | 2011 | Bolivia                        | this study      |
| Br7                      | <i>Triticum aestivum</i> | 1990 | Parana, Brazil                 | this study      |
| BR32<br>(BR0032)         | <i>Triticum aestivum</i> | 1991 | Brazil                         | [13]            |
| Br48                     | <i>Triticum aestivum</i> | 1990 | Mato Grosso do Sul<br>(Brazil) | [14]            |
| Br80                     | <i>Triticum aestivum</i> | 1991 | Brazil                         | this study      |

| Strain (ID if different) | Host                       | Year | Place of Isolation         | Sequence source |
|--------------------------|----------------------------|------|----------------------------|-----------------|
| Br130                    | <i>Triticum aestivum</i>   | 1990 | Mato Grosso do Sul, Brazil | this study      |
| P3                       | <i>Triticum durum</i>      | 2012 | Canindeyu, Paraguay        | this study      |
| PY0925                   | <i>Triticum aestivum</i>   | 2009 | Predizes, Brazil           | [15]            |
| PY36-1                   | <i>Triticum aestivum</i>   | 2007 | Brasilia, Brazil           | [15]            |
| PY5003                   | <i>Triticum aestivum</i>   | 2005 | Londrina, Brazil           | [15]            |
| PY5010                   | <i>Triticum aestivum</i>   | 2005 | Londrina, Brazil           | [15]            |
| PY5033                   | <i>Triticum aestivum</i>   | 2005 | Londrina, Brazil           | [15]            |
| PY6017                   | <i>Triticum aestivum</i>   | 2006 | Coromandel, Brazil         | [15]            |
| PY6045                   | <i>Triticum aestivum</i>   | 2006 | Goiania, Brazil            | [15]            |
| PY86-1                   | <i>Triticum aestivum</i>   | 2008 | Cascavel, Brazil           | [15]            |
| T25                      | <i>Triticum aestivum</i>   | 1988 | Parana, Brazil             | this study      |
| WHTQ                     | <i>Triticum aestivum</i> ) | ?    | Brazil                     | this study      |
| WBKY11                   | <i>Triticum aestivum</i>   | 2011 | Lexington, KY              | [22]            |
| P28                      | <i>Bromus tectorum</i>     | 2012 | Paraguay                   | this study      |
| P29                      | <i>Bromus tectorum</i>     | 2012 | Paraguay                   | this study      |
| CHRF                     | <i>Lolium perenne</i>      | 1996 | Silver Spring, MD          | this study      |
| CHW                      | <i>Lolium perenne</i>      | 1996 | Annapolis, MD              | this study      |
| FH                       | <i>Lolium perenne</i>      | 1997 | Hagerstown, MD             | [22]            |
| GG11                     | <i>Lolium perenne</i>      | 1997 | Lexington, KY              | this study      |
| HO                       | <i>Lolium perenne</i>      | 1996 | Richmond, PA               | this study      |
| LpKY97                   | <i>Lolium perenne</i>      | 1997 | Lexington, KY              | [22]            |

| Strain (ID if different) | Host                        | Year          | Place of Isolation | Sequence source |
|--------------------------|-----------------------------|---------------|--------------------|-----------------|
| PgKY4OV2.1<br>(PgKY)     | <i>Lolium perenne</i>       | 2000          | Lexington, KY      | [15]            |
| PgPA18C-02<br>(PGPA)     | <i>Lolium perenne</i>       | 1998          | Pennsylvania, USA  | [15]            |
| PL2-1                    | <i>Lolium multiflorum</i>   | 2002          | Pulaski Co., KY    | this study      |
| PL3-1                    | <i>Lolium multiflorum</i>   | 2002          | Pulaski Co., KY    | [22]            |
| Pg1213-22                | <i>Festuca arundinaceum</i> | 1999/<br>2000 | GA                 | this study      |
| TF05-1                   | <i>Festuca arundinaceum</i> | 2005          | Lexington, KY, USA | this study      |
| IB33                     | <i>Oryza sativa</i>         | ?             | Texas, USA         | A. Marchetti    |
| FR13                     | <i>Oryza sativa</i>         | 1988          | France             | [13]            |
| GY11                     | <i>Oryza sativa</i>         | 1988          | French Guyana      | [13]            |
| IA1                      | <i>Oryza sativa</i>         | 2009          | Arkansas, USA      | this study      |
| IB49                     | <i>Oryza sativa</i>         | 1992          | Arkansas, USA      | this study      |
| IC17                     | <i>Oryza sativa</i>         | 1992          | Arkansas, USA      | this study      |
| IE1K                     | <i>Oryza sativa</i>         | 2003          | Arkansas, USA      | this study      |
| INA168                   | <i>Oryza sativa</i>         | 1958          | Aichi, Japan       | [14]            |
| KEN53-33                 | <i>Oryza sativa</i>         | 1953          | Aichi, Japan       | [14]            |
| ML33                     | <i>Oryza sativa</i>         | 1995          | Mali               | this study      |
| P131                     | <i>Oryza sativa</i>         | ?             | Japan              | [52]            |

| Strain (ID if different) | Host                   | Year | Place of Isolation   | Sequence source |
|--------------------------|------------------------|------|----------------------|-----------------|
| Y34                      | <i>Oryza sativa</i>    | 1982 | China, Yunnan        | [52]            |
| P-2                      | <i>Oryza sativa</i>    | 1948 | Aichi, Japan         | [14]            |
| PH14<br>(PH0014-rn)      | <i>Oryza-sativa</i>    |      | The Philippines      | [13]            |
| TH3                      | <i>Oryza sativa</i>    | ?    | Thailand             | [14]            |
| 87-120                   | <i>Oryza sativa</i>    |      |                      |                 |
| TH12<br>(TH0012-rn)      | <i>Hordeum vulgare</i> |      | Thailand             | [13]            |
| TH16<br>(TH0016)         | <i>Hordeum vlgare</i>  |      | Thailand             | [13]            |
| Arcadia                  | <i>Setaria viridis</i> | 1998 | Lexington, KY, USA   | this study      |
| US71<br>(US0071)         | <i>Setaria</i>         |      | USA                  | [13]            |
| GrF52                    | <i>Setaria viridis</i> | 2001 | Lexington, KY, USA   | this study      |
| KANSV1-4-1               | <i>Setaria viridis</i> | 1975 | Kanagawa, Japan      | [14]            |
| SA05-43                  | <i>Setaria viridis</i> | 2005 | Nagasaki, Japan      | [14]            |
| Sv9610                   | <i>Setaria viridis</i> | 1996 | Zhejiang, China      | [53]            |
| Sv9623                   | <i>Setaria viridis</i> | 1996 | Zhejiang, China      | [53]            |
| GFSI1-7-2                | <i>Setaria italica</i> | 1977 | Gifu, Japan          | [14]            |
| B51                      | <i>Eleusine indica</i> | 2012 | Quirusillas, Bolivia | this study      |

| Strain (ID if different) | Host                           | Year | Place of Isolation               | Sequence source |
|--------------------------|--------------------------------|------|----------------------------------|-----------------|
| BR62                     | <i>Eleusine indica</i>         | 1991 | Brazil                           | this study      |
| CD156                    | <i>Eleusine indica</i>         | 1989 | Ferkessedougou,<br>Cote d'Ivoire | [13]            |
| EI9411                   | <i>Eleusine indica</i>         | 1990 | Fujian, China                    | [53]            |
| EI9064                   | <i>Eleusine indica</i>         | 1996 | Fujian, China                    | [53]            |
| G22                      | <i>Eleusine coracana</i>       | 1976 | Japan                            | this study      |
| Z2-1                     | <i>Eleusine coracana</i>       | 1977 | Kagawa, Japan                    | [14]            |
| PH42                     | <i>Eleusine indica</i>         | 1983 | The Philippines                  | this study      |
| SSFL02                   | <i>Stenotaphrum secundatum</i> | 2002 | Disneyworld, FL,<br>USA          | this study      |
| SSFL14-3                 | <i>Stenotaphrum secundatum</i> | 2014 | New Smyrna, FL,<br>USA           | this study      |
| G17                      | <i>Eragrostis curvula</i>      | 1976 | Japan                            | this study      |
| Br58                     | <i>Avena sativa</i>            | 1990 | Parana, Brazil                   | [14]            |
| Bd8401                   | <i>Brachiaria distachya</i>    | 1984 | The Philippines                  | this study      |
| Bm88324                  | <i>Brachiaria mutica</i>       | 1988 | The Philippines                  | this study      |
| PM1                      | <i>Pennisetum americanum</i>   | 1990 | Georgia, U.S.A                   | this study      |
| BR29                     | <i>Digitaria sanguinalis</i>   | 1989 | Brazil                           | [13]            |
| Dig41                    | <i>Digitaria sanguinalis</i>   | ND   | Hyogo, Japan                     | [14]            |

| <b>Strain (ID if different)</b> | <b>Host</b>                  | <b>Year</b> | <b>Place of Isolation</b> | <b>Sequence source</b> |
|---------------------------------|------------------------------|-------------|---------------------------|------------------------|
| DsLIZ                           | <i>Digitaria sanguinalis</i> | 2000        | Lexington, KY, USA        | this study             |
| VO107                           | <i>Digitaria sanguinalis</i> | 1981        | Texas, USA                | this study             |
| ND, no data                     |                              |             |                           |                        |

**Table 2. Summary of population genetic variation at 2682 single-copy orthologous genes in wheat, lolium, rice and setaria lineages of *Magnaporthe oryzae***

| Lineage | n  | S   | K   | H <sub>e</sub> | θ <sub>w</sub> | π        | PHI test (p-value) |
|---------|----|-----|-----|----------------|----------------|----------|--------------------|
| Wheat   | 20 | 5.8 | 1.9 | 0.17           | 1.28E-03       | 1.24E-03 | 0                  |
| Lolium  | 17 | 3.1 | 1.5 | 0.10           | 7.02E-04       | 6.54E-04 | 0                  |
| Rice    | 18 | 5.3 | 2.3 | 0.12           | 1.55E-03       | 7.75E-04 | 0                  |
| Setaria | 8  | 2.6 | 1.8 | 0.18           | 9.10E-04       | 7.68E-04 | 0                  |

Other lineages were not included in calculations because of too small a sample size ( $n < 6$ ); n is sample size; θ<sub>w</sub> is Watterson's θ per bp; π is nucleotide diversity per bp; H<sub>e</sub> is haplotype diversity; K is the number of haplotypes. PHI test is the Pairwise Homoplasmy Test. The PHI test is implemented in SPLITSTREE. The null hypothesis of no recombination was tested, for the PHI test using random permutations of the positions of the SNPs based on the expectation that sites are exchangeable if there is no recombination



## Figure legends

### **Figure 1. Discriminant Analysis of Principal Components, assuming K=10 clusters**

Each isolate is represented by a thick vertical line divided into K segments that represent the isolate's estimated membership probabilities in the K=10 clusters (note that all isolates have high membership probabilities in a single cluster, hence only a single segment is visible). The host of origin of samples is shown below the barplot.

**Figure 2. Total evidence maximum likelihood tree based on the concatenation of 2,682 orthologous coding sequences extracted from 76 *M. oryzae* genome.** Numbers above branches represent bootstrap supports after 100 bootstrap replicates. Only nodes with bootstrap support > 50 are labelled.

**Figure 3. Total evidence neighbor-joining distance tree using pairwise distances (SNPs/kb) calculated from analysis of pairwise blast alignments between repeat-masked genomes.** Only nodes with confidences > 80% (see methods) are labeled. Gray ovals are drawn around the main host-specialized populations for clarity.

**Figure 4. Maximum likelihood tree based on concatenated dataset comprising nine "Castroagudin" loci retrieved from 76 *M. oryzae* genomes.** Numbers above branches represent bootstrap supports after 100 bootstrap replicates. Only nodes with bootstrap support > 50 are labelled. Representatives of isolates used by Castroagudin et al. [24] in

their study were included in the analysis and are colored in light grey. Green dots mark the strains containing the *Pgt*-type allele according to Castroagudin et al. [24].

**Figure 5. ASTRAL analysis to test for incomplete lineage sorting/gene flow among 81 *Magnaporthe* genomes, using 2,241 single-copy, orthologous marker loci.** Dark branches represent branches that have a bootstrap support > 50 after multilocus bootstrapping. Number above branches represent q1 local support (i.e. the proportion of quartet trees in individual genealogies that agree with the topology recovered by the ASTRAL analysis around the branch). Black arrows show branches holding wheat blast isolates.

**Figure 6. Neighbor-Net network built with SPLITSTREE.** The figure shows relationships between haplotypes identified based on the full set of 25,078 SNPs identified in 2,682 single-copy orthologs, excluding sites missing data, gaps and singletons.

## Supplementary Tables legends

**Table S1. Pairwise distances measured in SNPs per megabase of uniquely aligned DNA**

**Table S2. Gene flow signatures from ABBA/BABA tests.** P1, P2, P3 refer to the three lineages used for the tests. The D statistic tests for an overrepresentation of ABBA versus BABA patterns. SE is the standard error. Z-score and P-value for the test of whether D differs significantly from zero, calculated using 1000 block jackknives of 100 SNPs. Analyses were based on 354,848 biallelic SNPs identified in 2241 single-copy orthologous genes, with *M. grisea* as the outgroup. Brachiaria\_1: Bm88324. Brachiaria\_2: Bd8401. Eleusine\_1 and Eleusine\_2 are, respectively, the light orange and orange clusters in DAPC analysis.

**Table S3. Summary statistics of genome assemblies used in this study.**

## Supplementary Figure legends

**Figures S1-S10 Maximum likelihood tree based on *MPG1*, *ACT1*, *b-tubulin1*, *BAC6*, *CAL*, *CH7BAC7*, *CH7BAC9*, *CHS*, *Ef1a* and *NUT1* marker, respectively.** Trees are represented as unrooted cladograms. Dark branches represent branches with bootstrap support > 50 after 100 bootstrap replicates (corresponding support are indicated). Clades are labeled according to the convention used by Castroagudin et al. [24]. Green dots: representatives of Pgt (*Pyricularia graminis-tritici* sp. nov.). Red dots: representatives of Pot (*Pyricularia oryzae* pathotype Triticum) clade 1. Blue dots: representatives of Pot clade 2. Orange dots: representatives of Poo (*Pyricularia oryzae* pathotype Oryza).

**Figure S11. Species tree inference based on the dataset of Castroagudin et al. [24] using ASTRAL.** The tree is represented as an unrooted cladogram.

Multilocus bootstrap supports above 50 are indicated above branches. Dark branches represent branches with bootstrap support > 50 after 100 bootstrap replicates (corresponding support are indicated). Number in brackets are q1 local quartet supports (i.e. the proportion of quartet trees in individual genealogies that agree with the topology recovered by the ASTRAL analysis around the branch). Clades are labeled according to the convention used by Castroagudin et al. [24] as in S1-S10 Figures.

**Figure S12. Bayesian Information Criterion vs number of clusters assumed in DAPC analysis.** The Bayesian Information Criterion assesses the fit of models of population structure assuming different K values.

**Figure S13. Neighbor joining tree showing the genetic distance separating the *M. oryzae* strains from *M. grisea* and *M. pennisetigena*.** Distances are in SNPs/kb.

**Figure S14. Distribution of *MPG1* alleles among *M. oryzae* isolates as indicated by mapping onto the neighboring tree built using whole genome SNP data.** *MPG1* alleles were identified by using a reference marker sequence to search all the genomes using BLAST.

**Figure S15. Distribution of alleles among *M. oryzae* isolates as indicated by mapping onto the neighboring tree built using whole genome SNP data.** Trees are shown for the following loci: A) BAC6, B)  $\beta$ -tubulin1, C) CAL, D) CH7BAC7, E) CH7BAC9, F) EF1 $\alpha$ , G) NUT1. Sequence variants are noted above each tree using the BLAST backtrace operations (BTOP) format.

**Figure S16. A) Log likelihood of data vs number of clusters assumed in STRUCTURE analysis.** Error bars are standard deviations of likelihood across STRUCTURE repeats. **B) STRUCTURE analysis of population subdivision, assuming K=2 to K=15 clusters.** Each isolate is represented by a thick vertical line divided into K segments that represent the isolate's estimated membership proportions in the K clusters (note that two to seven clusters are empty, i.e. represented by no isolates, for models with K>9). The host of origin of samples is shown below the barplot.

## References

1. Fournier E, Giraud T, Albertini C, Brygoo Y. Partition of the *Botrytis cinerea* complex in France using multiple gene genealogies. *Mycologia*. 2005;97(6):1251-67. Epub 2006/05/26. PubMed PMID: 16722218.
2. Le Gac M, Hood ME, Fournier E, Giraud T. Phylogenetic evidence of host-specific cryptic species in the anther smut fungus. *Evolution; international journal of organic evolution*. 2007;61(1):15-26. Epub 2007/02/16. doi: 10.1111/j.1558-5646.2007.00002.x. PubMed PMID: 17300424.
3. Taylor JW, Fisher MC. Fungal multilocus sequence typing--it's not just for bacteria. *Current opinion in microbiology*. 2003;6(4):351-6. Epub 2003/08/28. PubMed PMID: 12941403.
4. Planet PJ, Narechania A, Chen L, Mathema B, Boundy S, Archer G, et al. Architecture of a Species: Phylogenomics of *Staphylococcus aureus*. *Trends in microbiology*. 2017;25(2):153-66. Epub 2016/10/19. doi: 10.1016/j.tim.2016.09.009. PubMed PMID: 27751626.
5. Seehausen O, Butlin RK, Keller I, Wagner CE, Boughman JW, Hohenlohe PA, et al. Genomics and the origin of species. *Nature reviews Genetics*. 2014;15(3):176-92. Epub 2014/02/19. doi: 10.1038/nrg3644. PubMed PMID: 24535286.
6. Giraud T, Gladieux P, Gavrillets S. Linking the emergence of fungal plant diseases with ecological speciation. *Trends in ecology & evolution*. 2010;25(7):387-95. Epub 2010/05/04. doi: 10.1016/j.tree.2010.03.006. PubMed PMID: 20434790; PubMed Central PMCID: PMC2885483.
7. Giraud T, Villareal LM, Austerlitz F, Le Gac M, Lavigne C. Importance of the life cycle in sympatric host race formation and speciation of pathogens. *Phytopathology*. 2006;96(3):280-7. Epub 2008/10/24. doi: 10.1094/phyto-96-0280. PubMed PMID: 18944443.
8. Klaubauf S, Tharreau D, Fournier E, Groenewald JZ, Crous PW, de Vries RP, et al. Resolving the polyphyletic nature of *Pyricularia* (Pyriculariaceae). *Studies in mycology*. 2014;79:85-120. Epub 2014/12/11. doi: 10.1016/j.simyco.2014.09.004. PubMed PMID: 25492987; PubMed Central PMCID: PMC4255532.
9. Ou SH. A look at worldwide rice blast disease control. *Plant disease*. 1980;64(5):439-45.
10. Ou SH. Rice Diseases. Ou SH, editor. Slough, UK: Commonwealth Agricultural Bureaux; 1985.
11. Couch BC, Fudal I, Lebrun MH, Tharreau D, Valent B, van Kim P, et al. Origins of host-specific populations of the blast pathogen *Magnaporthe oryzae* in crop domestication with subsequent expansion of pandemic clones on rice and weeds of rice. *Genetics*. 2005;170(2):613-30. Epub 2005/04/02. doi: 10.1534/genetics.105.041780. PubMed PMID: 15802503; PubMed Central PMCID: PMC1450392.
12. Farman ML. *Pyricularia grisea* isolates causing gray leaf spot on perennial ryegrass (*Lolium perenne*) in the United States: relationship to *P. grisea* isolates from other host plants. *Phytopathology*. 2002;92. doi: 10.1094/phyto.2002.92.3.245.
13. Chiapello H, Mallet L, Guerin C, Aguileta G, Amselem J, Kroj T, et al. Deciphering genome content and evolutionary relationships of isolates from the fungus *Magnaporthe*

- oryzae* attacking different host plants. *Genome Biol Evol.* 2015;7(10):2896-912. doi: 10.1093/gbe/evv187. PubMed PMID: 26454013; PubMed Central PMCID: PMC4684704.
14. Yoshida K, Saunders DG, Mitsuoka C, Natsume S, Kosugi S, Saitoh H, et al. Host specialization of the blast fungus *Magnaporthe oryzae* is associated with dynamic gain and loss of genes linked to transposable elements. *BMC Genomics.* 2016;17:370. doi: 10.1186/s12864-016-2690-6. PubMed PMID: 27194050; PubMed Central PMCID: PMC4870811.
  15. Islam MT, Croll D, Gladieux P, Soanes DM, Persoons A, Bhattacharjee P, et al. Emergence of wheat blast in Bangladesh was caused by a South American lineage of *Magnaporthe oryzae*. *BMC Biol.* 2016;14(1):84. doi: 10.1186/s12915-016-0309-7. PubMed PMID: 27716181; PubMed Central PMCID: PMC4870811.
  16. Igarashi S. Update on wheat blast (*Pyricularia oryzae*) in Brazil. In: Saunders D, editor. *Proceedings of the International Conference – Wheat for the Nontraditional Warm Areas.* Mexico DF, Mexico: CIMMYT; 1990.
  17. Cabrera M, Gutiérrez S. Primer registro de *Pyricularia grisea* en cultivos de trigo del NE de Argentina. Depto2007. Available from: [agr.unne.edu.ar/Extension/Res2007/SanVegetal/SanVegetal\\_06.pdf](http://agr.unne.edu.ar/Extension/Res2007/SanVegetal/SanVegetal_06.pdf).
  18. Viedma L. Wheat blast occurrence in Paraguay. *Phytopathology.* 2005;95:S152.
  19. Kohli MM, Mehta YR, Guzman E, De Viedma L, Cubilla LE. *Pyricularia* blast – a threat to wheat cultivation. *Czech J Genet Plant Breed.* 2011;47:S130-4.
  20. Maciel JLN, Ceresini PC, Castroagudin VL, Zala M, Kema GHJ, McDonald BA. Population structure and pathotype diversity of the wheat blast pathogen *Magnaporthe oryzae* 25 years after its emergence in Brazil. *Phytopathology.* 2014;104. doi: 10.1094/phyto-11-12-0294-r.
  21. Cruz CD, Valent B. Wheat blast disease: danger on the move. *Tropical Plant Pathology.* 2017;1-13.
  22. Farman ML, Peterson GL, Chen L, Starnes JH, Valent B, Bachi P, et al. The *Lolium* pathotype of *Magnaporthe oryzae* recovered from a single blasted wheat plant in the United States. *Plant Dis.* 2017;101:684-92.
  23. Malaker PK, Barma NCD, Tiwari TP, Collis WJ, Duveiller E, Singh PK, et al. First report of wheat blast caused by *Magnaporthe oryzae* pathotype *tritium* in Bangladesh. *Plant Dis.* 2016;100(11):2330-. doi: 10.1094/PDIS-05-16-0666-PDN.
  24. Castroagudin VL, Moreira SI, Pereira DAS, Moreira SS, Brunner PC, Maciel JLN, et al. Wheat blast disease caused by *Pyricularia graminis-tritici* sp. nov. *Persoonia.* 2016;37.
  25. Dettman JR, Jacobson DJ, Taylor JW. A multilocus genealogical approach to phylogenetic species recognition in the model eukaryote *Neurospora*. *Evolution; international journal of organic evolution.* 2003;57(12):2703-20. Epub 2004/02/06. PubMed PMID: 14761051.
  26. Taylor JW, Jacobson DJ, Kroken S, Kasuga T, Geiser DM, Hibbett DS, et al. Phylogenetic species recognition and species concepts in fungi. *Fungal genetics and biology : FG & B.* 2000;31(1):21-32. Epub 2000/12/16. doi: 10.1006/fgbi.2000.1228. PubMed PMID: 11118132.
  27. Mirarab S, Reaz R, Bayzid MS, Zimmermann T, Swenson MS, Warnow T. ASTRAL: genome-scale coalescent-based species tree estimation. *Bioinformatics.* 2014;30(17):i541-

8. doi: 10.1093/bioinformatics/btu462. PubMed PMID: 25161245; PubMed Central PMCID: PMC4147915.
28. Mirarab S, Warnow T. ASTRAL-II: coalescent-based species tree estimation with many hundreds of taxa and thousands of genes. *Bioinformatics*. 2015;31(12):i44-52. doi: 10.1093/bioinformatics/btv234. PubMed PMID: 26072508; PubMed Central PMCID: PMC4765870.
29. Sayyari E, Mirarab S. Fast Coalescent-Based Computation of Local Branch Support from Quartet Frequencies. *Mol Biol Evol*. 2016;33(7):1654-68. doi: 10.1093/molbev/msw079. PubMed PMID: 27189547; PubMed Central PMCID: PMC4915361.
30. Jombart T, Devillard S, Balloux F. Discriminant analysis of principal components: a new method for the analysis of genetically structured populations. *BMC genetics*. 2010;11:94. doi: 10.1186/1471-2156-11-94. PubMed PMID: 20950446; PubMed Central PMCID: PMC2973851.
31. Huson DH, Bryant D. Application of phylogenetic networks in evolutionary studies. *Molecular biology and evolution*. 2005;23(2):254-67.
32. Edwards SV, Xi Z, Janke A, Faircloth BC, McCormack JE, Glenn TC, et al. Implementing and testing the multispecies coalescent model: a valuable paradigm for phylogenomics. *Molecular phylogenetics and evolution*. 2016;94:447-62.
33. Martin SH, Dasmahapatra KK, Nadeau NJ, Salazar C, Walters JR, Simpson F, et al. Genome-wide evidence for speciation with gene flow in *Heliconius* butterflies. *Genome Res*. 2013;23(11):1817-28. doi: 10.1101/gr.159426.113. PubMed PMID: PMC3814882.
34. Falush D, Stephens M, Pritchard JK. Inference of population structure using multilocus genotype data: linked loci and correlated allele frequencies. *Genetics*. 2003;164(4):1567-87. PubMed PMID: 12930761; PubMed Central PMCID: PMC1462648.
35. Pritchard JK, Stephens M, Donnelly P. Inference of population structure using multilocus genotype data. *Genetics*. 2000;155(2):945-59. PubMed PMID: 10835412; PubMed Central PMCID: PMC1461096.
36. Hubisz MJ, Falush D, Stephens M, Pritchard JK. Inferring weak population structure with the assistance of sample group information. *Molecular ecology resources*. 2009;9(5):1322-32.
37. Kato H, Yamamoto M, Yamaguchi-Ozaki T. Pathogenicity, mating ability and DNA restriction fragment length polymorphisms of *Pyricularia* populations isolated from Gramineae, Bambusideae and Zingiberaceae plants. *J Gen Plant Pathol*. 2000;66. doi: 10.1007/pl00012919.
38. Urashima AS, Igarashi S, Kato H. Host range, mating type and fertility of *Pyricularia grisea* from wheat in Brazil. *Plant Disease*. 1993;77. doi: 10.1094/pd-77-1211.
39. Orbach MJ, Chumley FG, Valent B. Electrophoretic karyotypes of *Magnaporthe grisea* pathogens of diverse grasses. *MPMI-Molecular Plant Microbe Interactions*. 1996;9(4):261-71.
40. Thi T, Vy P, Hyon G-s, Thi N, Nga T, Inoue Y, et al. Genetic analysis of host-pathogen incompatibility between *Lolium* isolates of *Pyriculariaoryzae* and wheat. *Journal of General Plant Pathology: JGPP*. 2014;80(1):59.



41. Nosil P, Vines TH, Funk DJ. Perspective: Reproductive isolation caused by natural selection against immigrants from divergent habitats. *Evolution; international journal of organic evolution*. 2005;59(4):705-19. PubMed PMID: 15926683.
42. Kato H, Yamamoto M, Yamaguchi-Ozaki T, Kadouchi H, Iwamoto Y, Nakayashiki H, et al. Pathogenicity, mating ability and DNA restriction fragment length polymorphisms of *Pyricularia* populations isolated from Gramineae, Bambusideae and Zingiberaceae plants. *Journal of General Plant Pathology*. 2000;66(1):30-47.
43. Takabayashi N, Tosa Y, Oh HS, Mayama S. A gene-for-gene relationship underlying the species-specific parasitism of *Avena/Triticum* isolates of *Magnaporthe grisea* on wheat cultivars. *Phytopathology*. 2002;92(11):1182-8.
44. Tosa Y, Tamba H, Tanaka K, Mayama S. Genetic analysis of host species specificity of *Magnaporthe oryzae* isolates from rice and wheat. *Phytopathology*. 2006;96(5):480-4.
45. Heath MC, Valent B, Howard RJ, Chumley FG. Interactions of two strains of *Magnaporthe grisea* with rice, goosegrass, and weeping lovegrass. *Canadian Journal of Botany*. 1990;68(8):1627-37.
46. Gurr S, Samalova M, Fisher M. The rise and rise of emerging infectious fungi challenges food security and ecosystem health. *Fungal Biol Rev*. 2011;25(4):181-8. doi: <https://doi.org/10.1016/j.fbr.2011.10.004>.
47. Silué D, Nottoghem JL. Production of perithecia of *Magnaporthe grisea* on rice plants. *Mycol Res*. 1990;94(8):1151-2.
48. Saleh D, Xu P, Shen Y, Li C, Adreit H, Milazzo J, et al. Sex at the origin: an Asian population of the rice blast fungus *Magnaporthe oryzae* reproduces sexually. *Molecular ecology*. 2012;21(6):1330-44. Epub 2012/02/09. doi: 10.1111/j.1365-294X.2012.05469.x. PubMed PMID: 22313491.
49. Lemaire C, De Gracia M, Leroy T, Michalecka M, Lindhard-Pedersen H, Guerin F, et al. Emergence of new virulent populations of apple scab from nonagricultural disease reservoirs. *The New phytologist*. 2016;209(3):1220-9. Epub 2015/10/03. doi: 10.1111/nph.13658. PubMed PMID: 26428268.
50. Hibbett DS, Taylor JW. Fungal systematics: is a new age of enlightenment at hand? *Nature reviews Microbiology*. 2013;11(2):129-33. Epub 2013/01/05. doi: 10.1038/nrmicro2963. PubMed PMID: 23288349.
51. Yoshida K, Saitoh H, Fujisawa S, Kanzaki H, Matsumura H, Yoshida K, et al. Association genetics reveals three novel avirulence genes from the rice blast fungal pathogen *Magnaporthe oryzae*. *Plant Cell*. 2009;21(5):1573-91. doi: 10.1105/tpc.109.066324. PubMed PMID: 19454732; PubMed Central PMCID: PMC2700537.
52. Xue M, Yang J, Li Z, Hu S, Yao N, Dean RA, et al. Comparative analysis of the genomes of two field isolates of the rice blast fungus *Magnaporthe oryzae*. *PLoS Genet*. 2012;8(8):e1002869. doi: 10.1371/journal.pgen.1002869. PubMed PMID: 22876203; PubMed Central PMCID: PMC3410873.
53. Zhong Z, Norvienyeku J, Chen M, Bao J, Lin L, Chen L, et al. Directional selection from host plants is a major force driving host specificity in *Magnaporthe* species. *Sci Rep*. 2016;6:25591. doi: 10.1038/srep25591. PubMed PMID: 27151494; PubMed Central PMCID: PMC4858695.
54. Zerbino DR, Birney E. Velvet: algorithms for de novo short read assembly using de Bruijn graphs. *Genome research*. 2008;18(5):821-9.

55. Keller O, Kollmar M, Stanke M, Waack S. A novel hybrid gene prediction method employing protein multiple sequence alignments. *Bioinformatics*. 2011;27(6):757-63. Epub 2011/01/11. doi: 10.1093/bioinformatics/btr010. PubMed PMID: 21216780.
56. Lechner M, Findeiss S, Steiner L, Marz M, Stadler PF, Prohaska SJ. Proteinortho: detection of (co-)orthologs in large-scale analysis. *BMC Bioinformatics*. 2011;12:124. Epub 2011/04/30. doi: 10.1186/1471-2105-12-124. PubMed PMID: 21526987; PubMed Central PMCID: PMC3114741.
57. Dean RA, Talbot NJ, Ebbole DJ, Farman ML, Mitchell TK, Orbach MJ. The genome sequence of the rice blast fungus *Magnaporthe grisea*. *Nature*. 2005;434. doi: 10.1038/nature03449.
58. Ranwez V, Harispe S, Delsuc F, Douzery EJ. MACSE: Multiple Alignment of Coding SEquences accounting for frameshifts and stop codons. *PloS one*. 2011;6(9):e22594. Epub 2011/09/29. doi: 10.1371/journal.pone.0022594. PubMed PMID: 21949676; PubMed Central PMCID: PMC3174933.
59. De Mita S, Siol M. EggLib: processing, analysis and simulation tools for population genetics and genomics. *BMC genetics*. 2012;13:27. Epub 2012/04/13. doi: 10.1186/1471-2156-13-27. PubMed PMID: 22494792; PubMed Central PMCID: PMC3350404.
60. Stamatakis A. RAxML version 8: a tool for phylogenetic analysis and post-analysis of large phylogenies. *Bioinformatics*. 2014;30(9):1312-3. Epub 2014/01/24. doi: 10.1093/bioinformatics/btu033. PubMed PMID: 24451623; PubMed Central PMCID: PMC3998144.
61. Altschul SF, Madden TL, Schaffer AA, Zhang J, Zhang Z, Miller W, et al. Gapped BLAST and PSI-BLAST: a new generation of protein database search programs. *Nucleic Acids Res*. 1997;25(17):3389-402. PubMed PMID: 9254694; PubMed Central PMCID: PMC146917.
62. Huson DH. SplitsTree: analyzing and visualizing evolutionary data. *Bioinformatics*. 1998;14(1):68-73. Epub 1998/04/01. PubMed PMID: 9520503.
63. Durand EY, Patterson N, Reich D, Slatkin M. Testing for ancient admixture between closely related populations. *Mol Biol Evol*. 2011;28(8):2239-52. doi: 10.1093/molbev/msr048. PubMed PMID: 21325092; PubMed Central PMCID: PMC3144383.
64. Paradis E, Claude J, Strimmer K. APE: Analyses of Phylogenetics and Evolution in R language. *Bioinformatics*. 2004;20(2):289-90. PubMed PMID: 14734327.

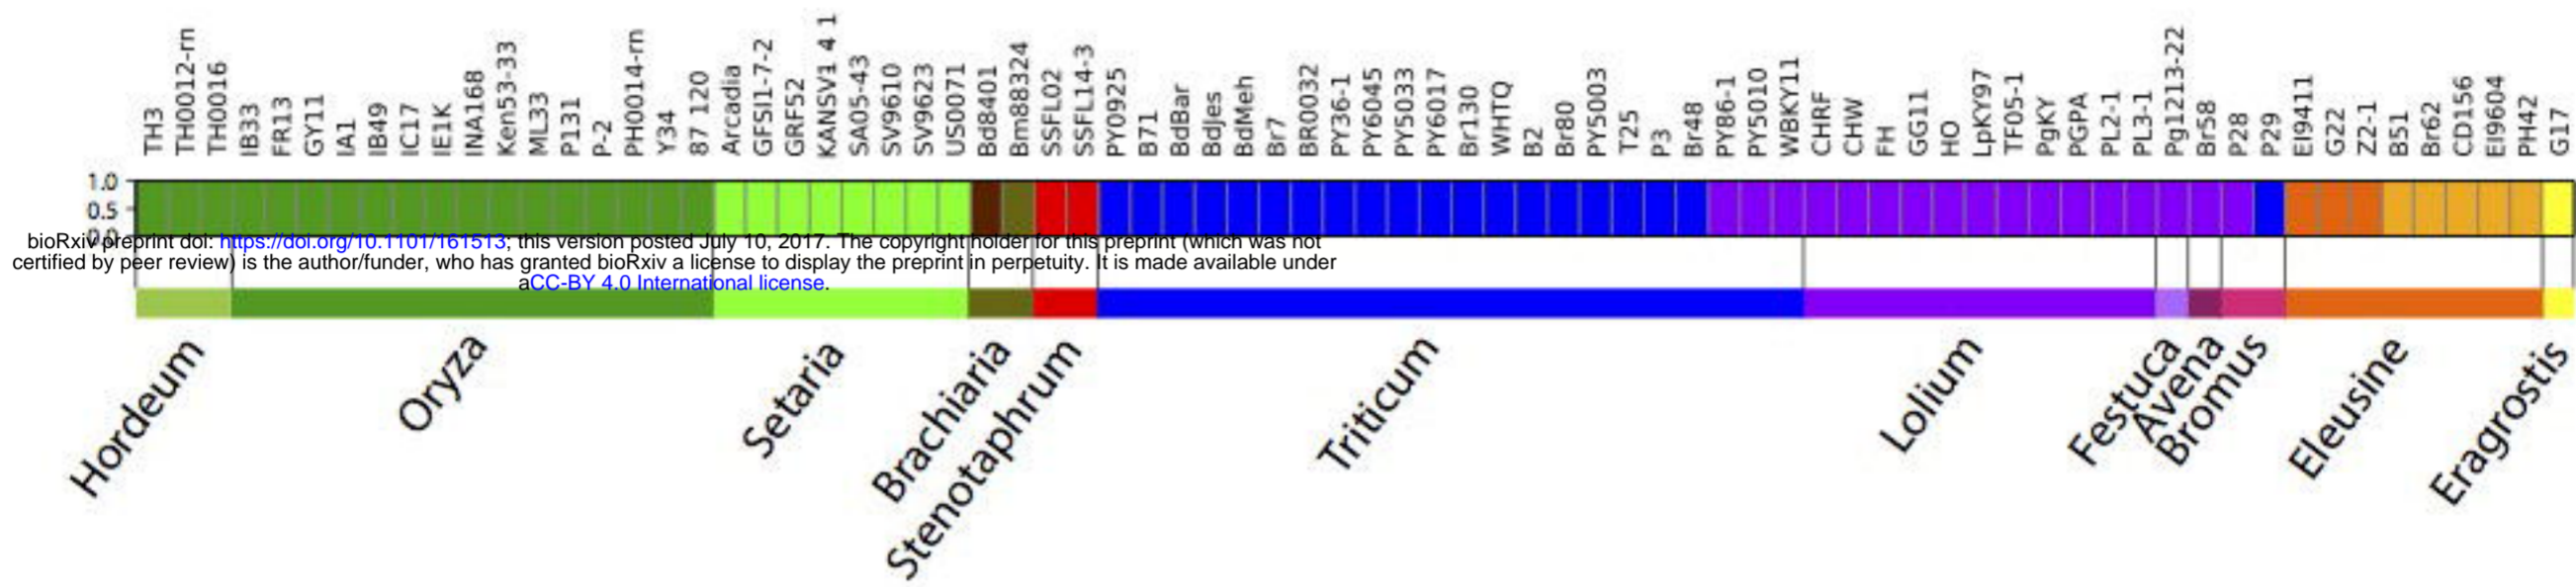

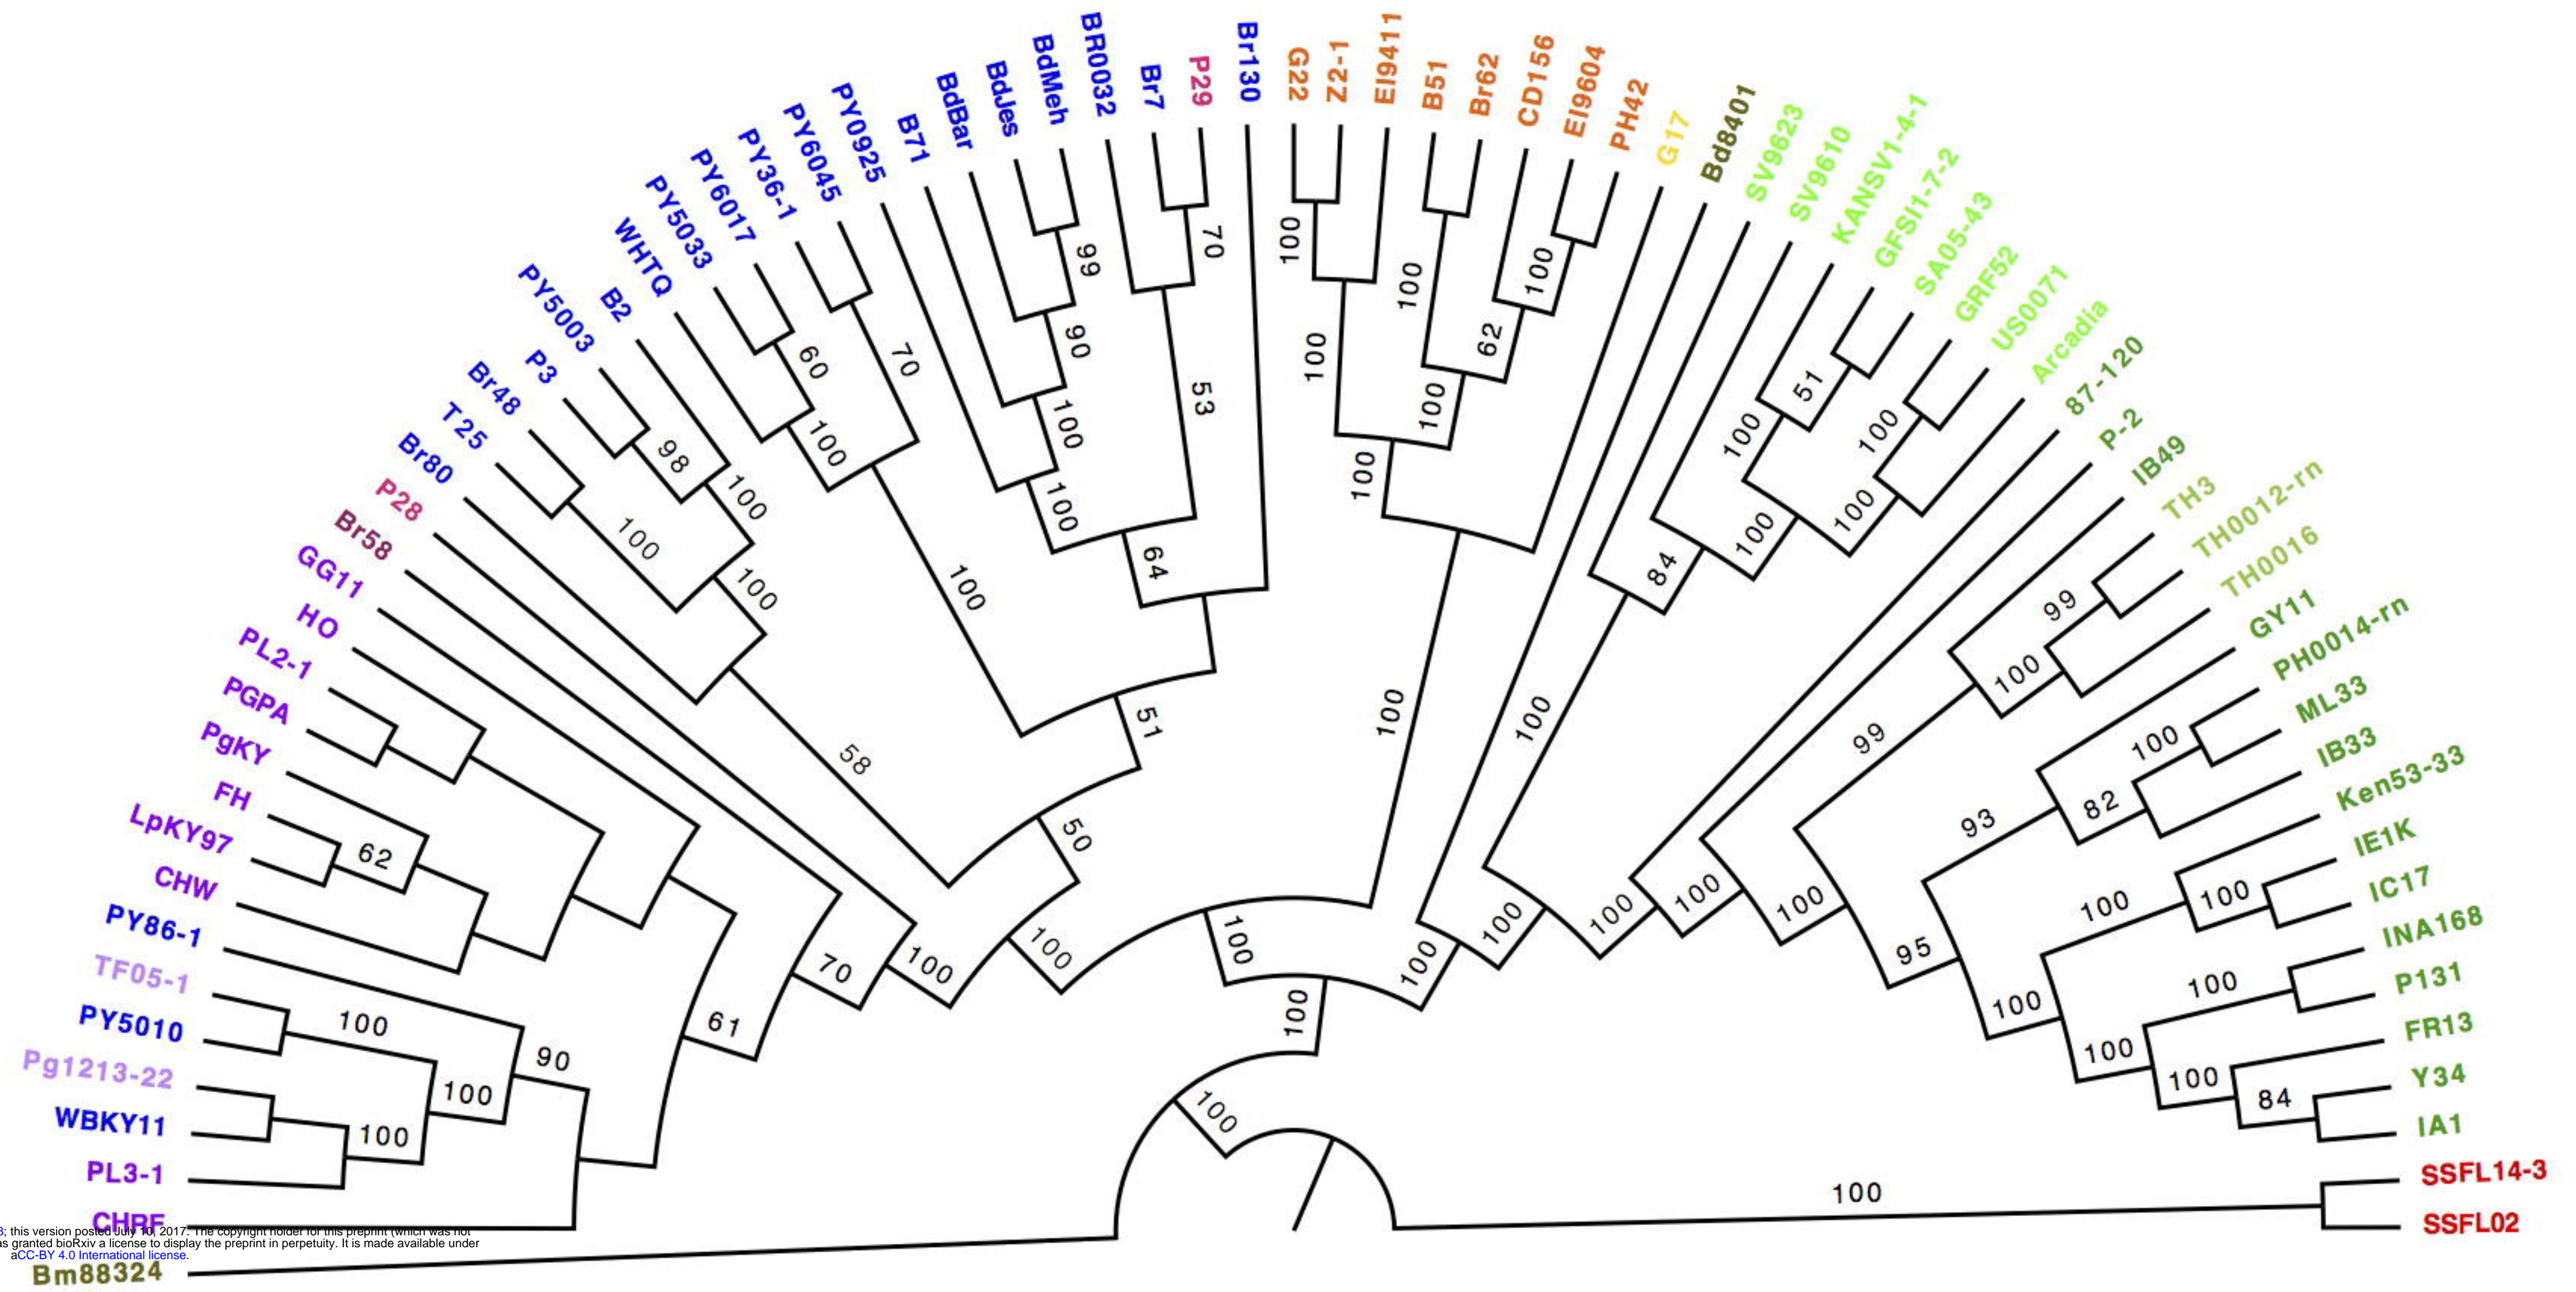

3.0

- |                                                   |                                                     |                                                  |                                               |                                                    |                                                 |
|---------------------------------------------------|-----------------------------------------------------|--------------------------------------------------|-----------------------------------------------|----------------------------------------------------|-------------------------------------------------|
| <span style="color: green;">■</span> Oryza        | <span style="color: lightgreen;">■</span> Setaria   | <span style="color: orange;">■</span> Eleusine   | <span style="color: blue;">■</span> Triticum  | <span style="color: purple;">■</span> Lolium       | <span style="color: darkpurple;">■</span> Avena |
| <span style="color: lightgreen;">■</span> Hordeum | <span style="color: darkgreen;">■</span> Brachiaria | <span style="color: yellow;">■</span> Eragrostis | <span style="color: magenta;">■</span> Bromus | <span style="color: lightpurple;">■</span> Festuca | <span style="color: red;">■</span> Stenotaphrum |

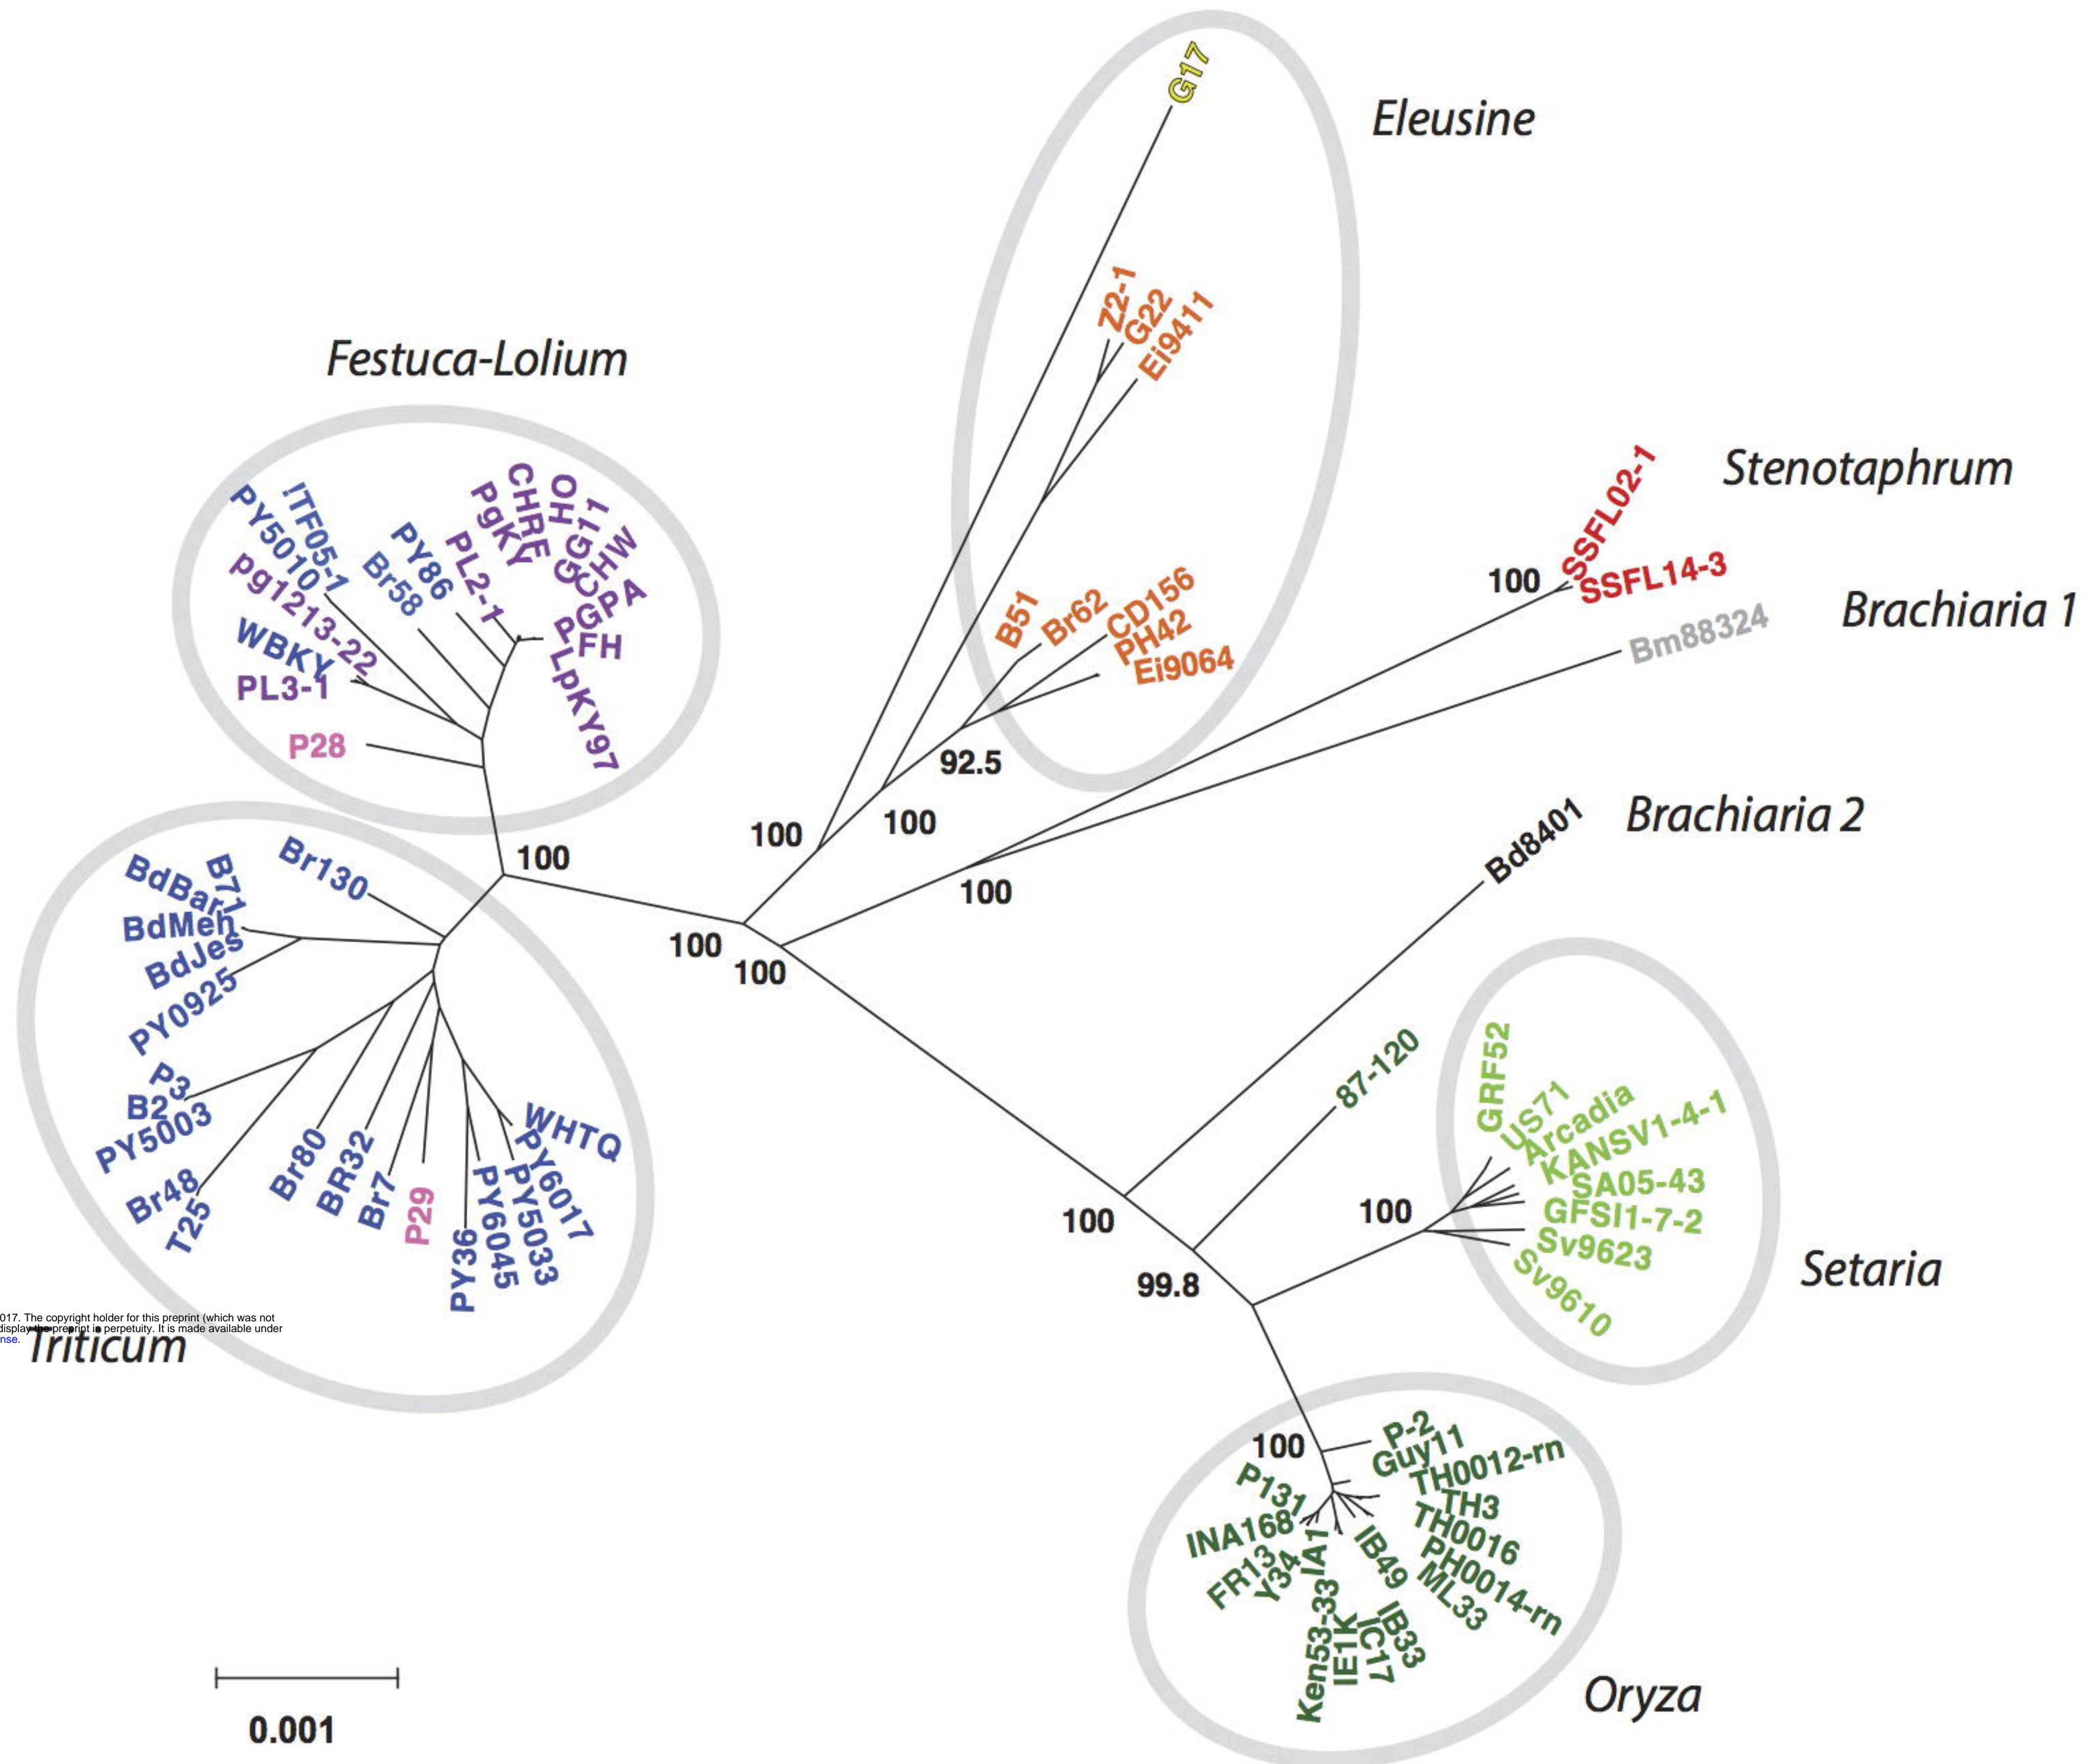

Figure 3

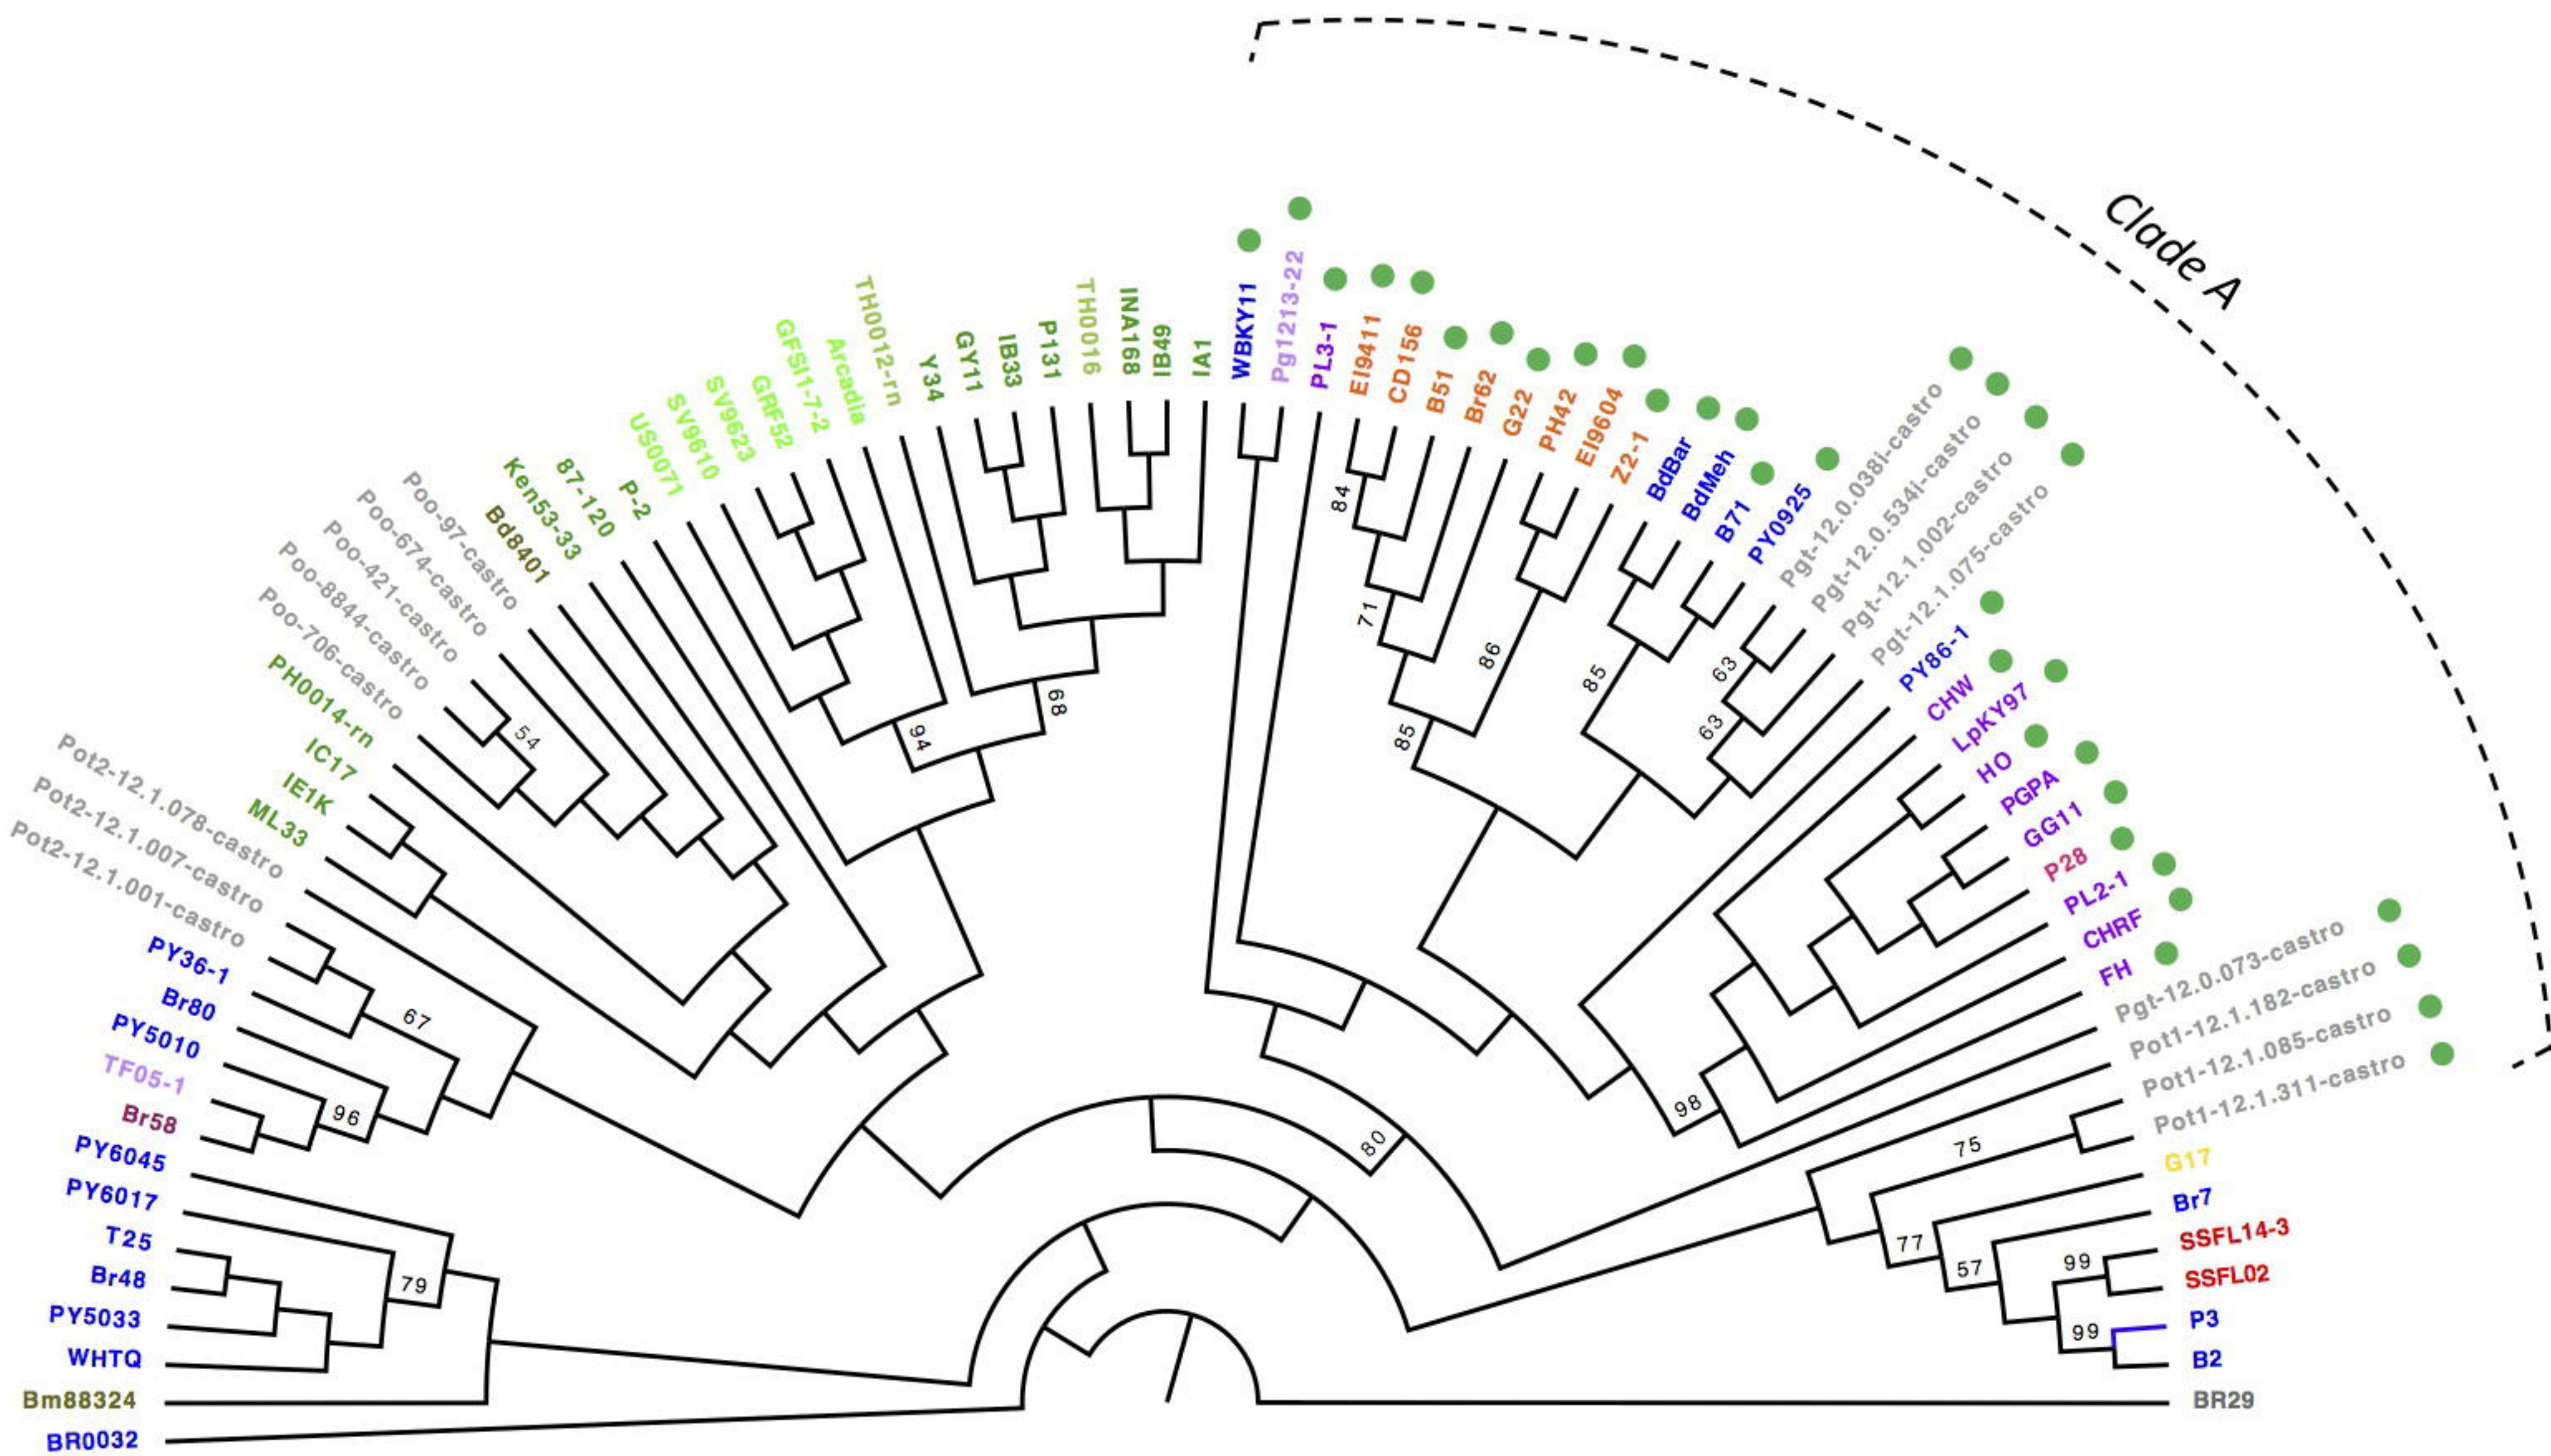

bioRxiv preprint doi: <https://doi.org/10.1101/161513>; this version posted July 10, 2017. The copyright holder for this preprint (which was not certified by peer review) is the author/funder, who has granted bioRxiv a license to display the preprint in perpetuity. It is made available under aCC-BY 4.0 International license.

2.0

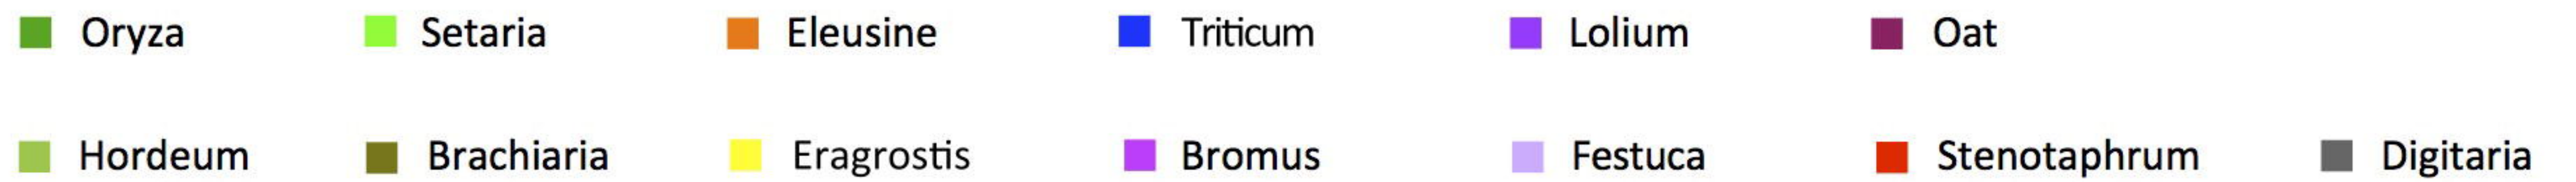

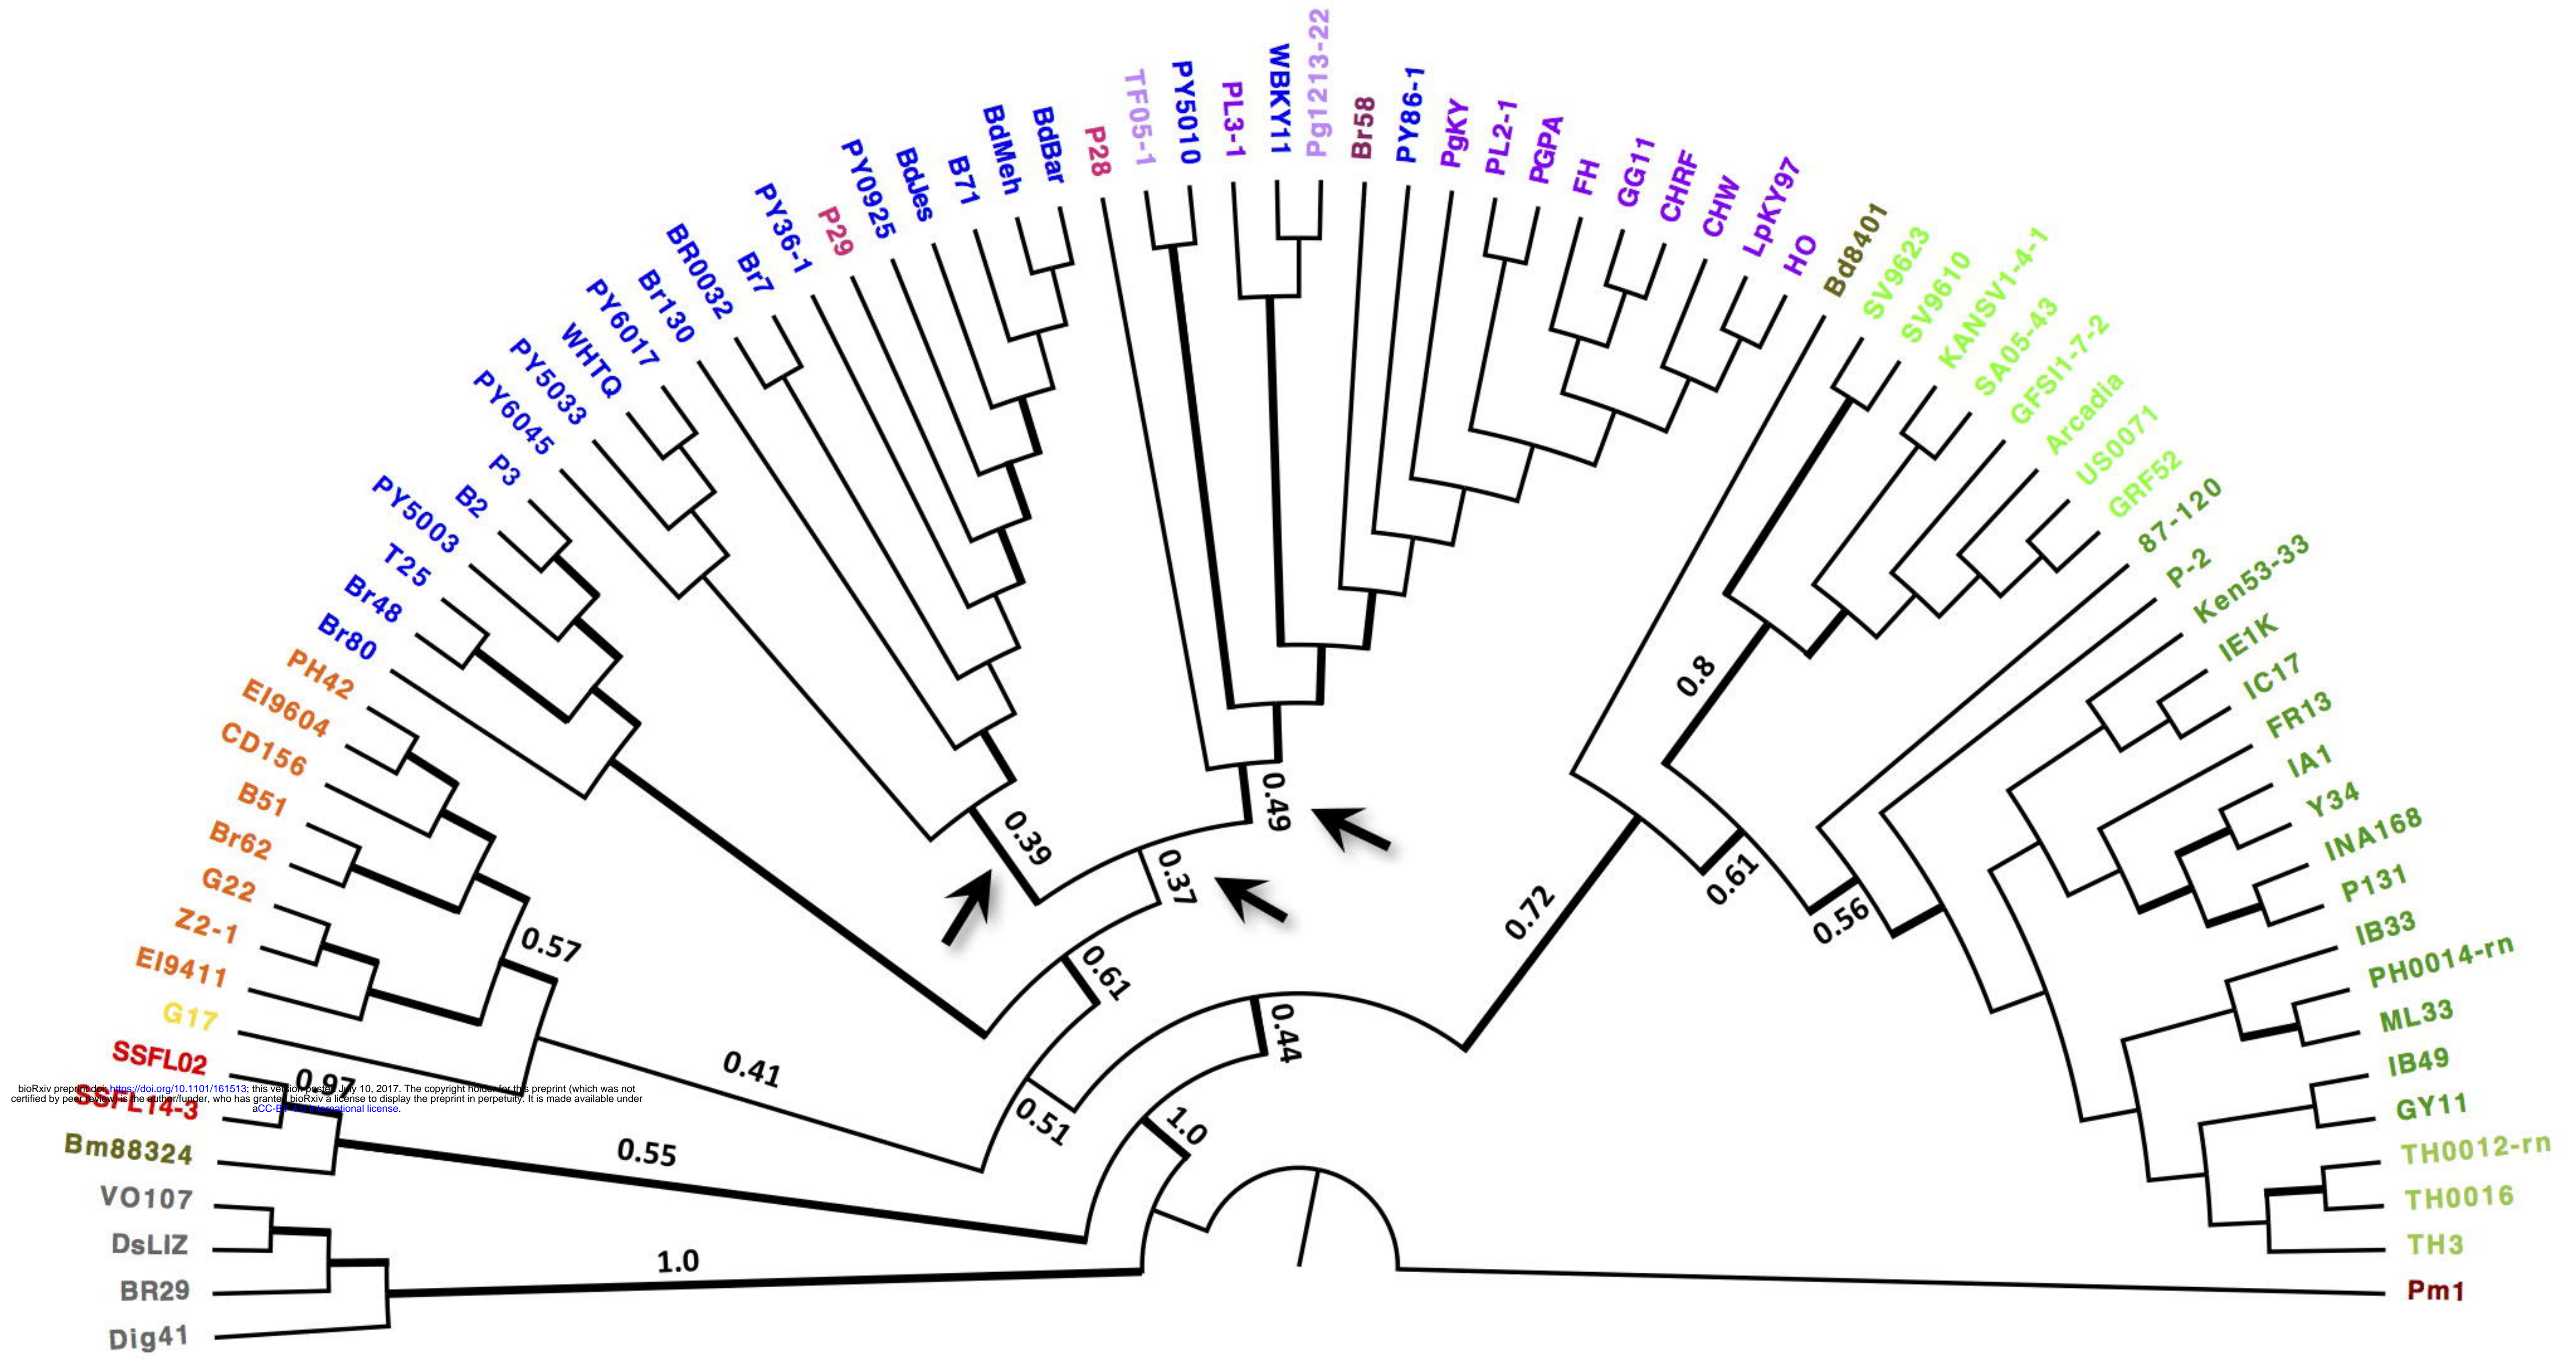

bioRxiv preprint doi: <https://doi.org/10.1101/161513>; this version posted October 10, 2017. The copyright holder for this preprint (which was not certified by peer review) is the author/funder, who has granted bioRxiv a license to display the preprint in perpetuity. It is made available under aCC-BY 4.0 International license.

- |                                                   |                                                     |                                                  |                                               |                                                    |                                                 |                                                 |
|---------------------------------------------------|-----------------------------------------------------|--------------------------------------------------|-----------------------------------------------|----------------------------------------------------|-------------------------------------------------|-------------------------------------------------|
| <span style="color: green;">■</span> Oryza        | <span style="color: lightgreen;">■</span> Setaria   | <span style="color: orange;">■</span> Eleusine   | <span style="color: blue;">■</span> Triticum  | <span style="color: purple;">■</span> Lolium       | <span style="color: darkpurple;">■</span> Oat   | <span style="color: brown;">■</span> Pennisetum |
| <span style="color: lightgreen;">■</span> Hordeum | <span style="color: darkgreen;">■</span> Brachiaria | <span style="color: yellow;">■</span> Eragrostis | <span style="color: magenta;">■</span> Bromus | <span style="color: lightpurple;">■</span> Festuca | <span style="color: red;">■</span> Stenotaphrum | <span style="color: grey;">■</span> Digitaria   |

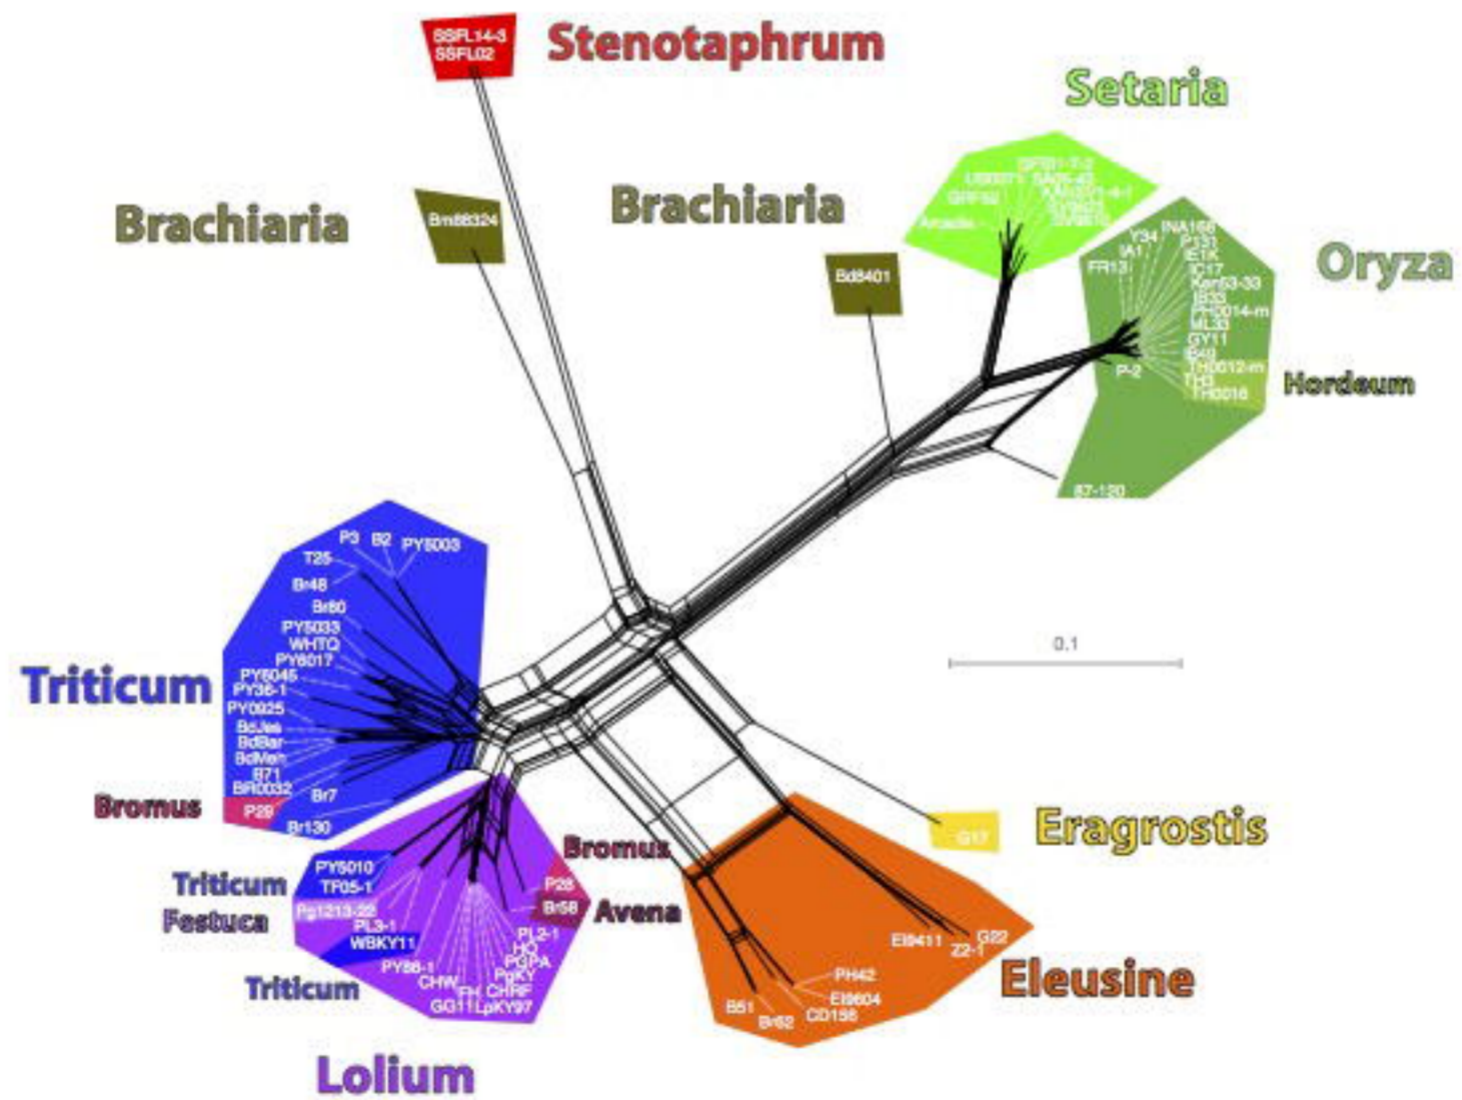

Source: https://www.biorxiv.org/content/10.1101/161513v1.full.pdf
